# Supplementary material
Source: publisher figshare collection journal article supplement (https://gsajournals.figshare.com/articles/dataset/_/8268167)
Supplement: Supplementary file 1 [file 1]

(S3A)

Coord. 2 (15.76%)

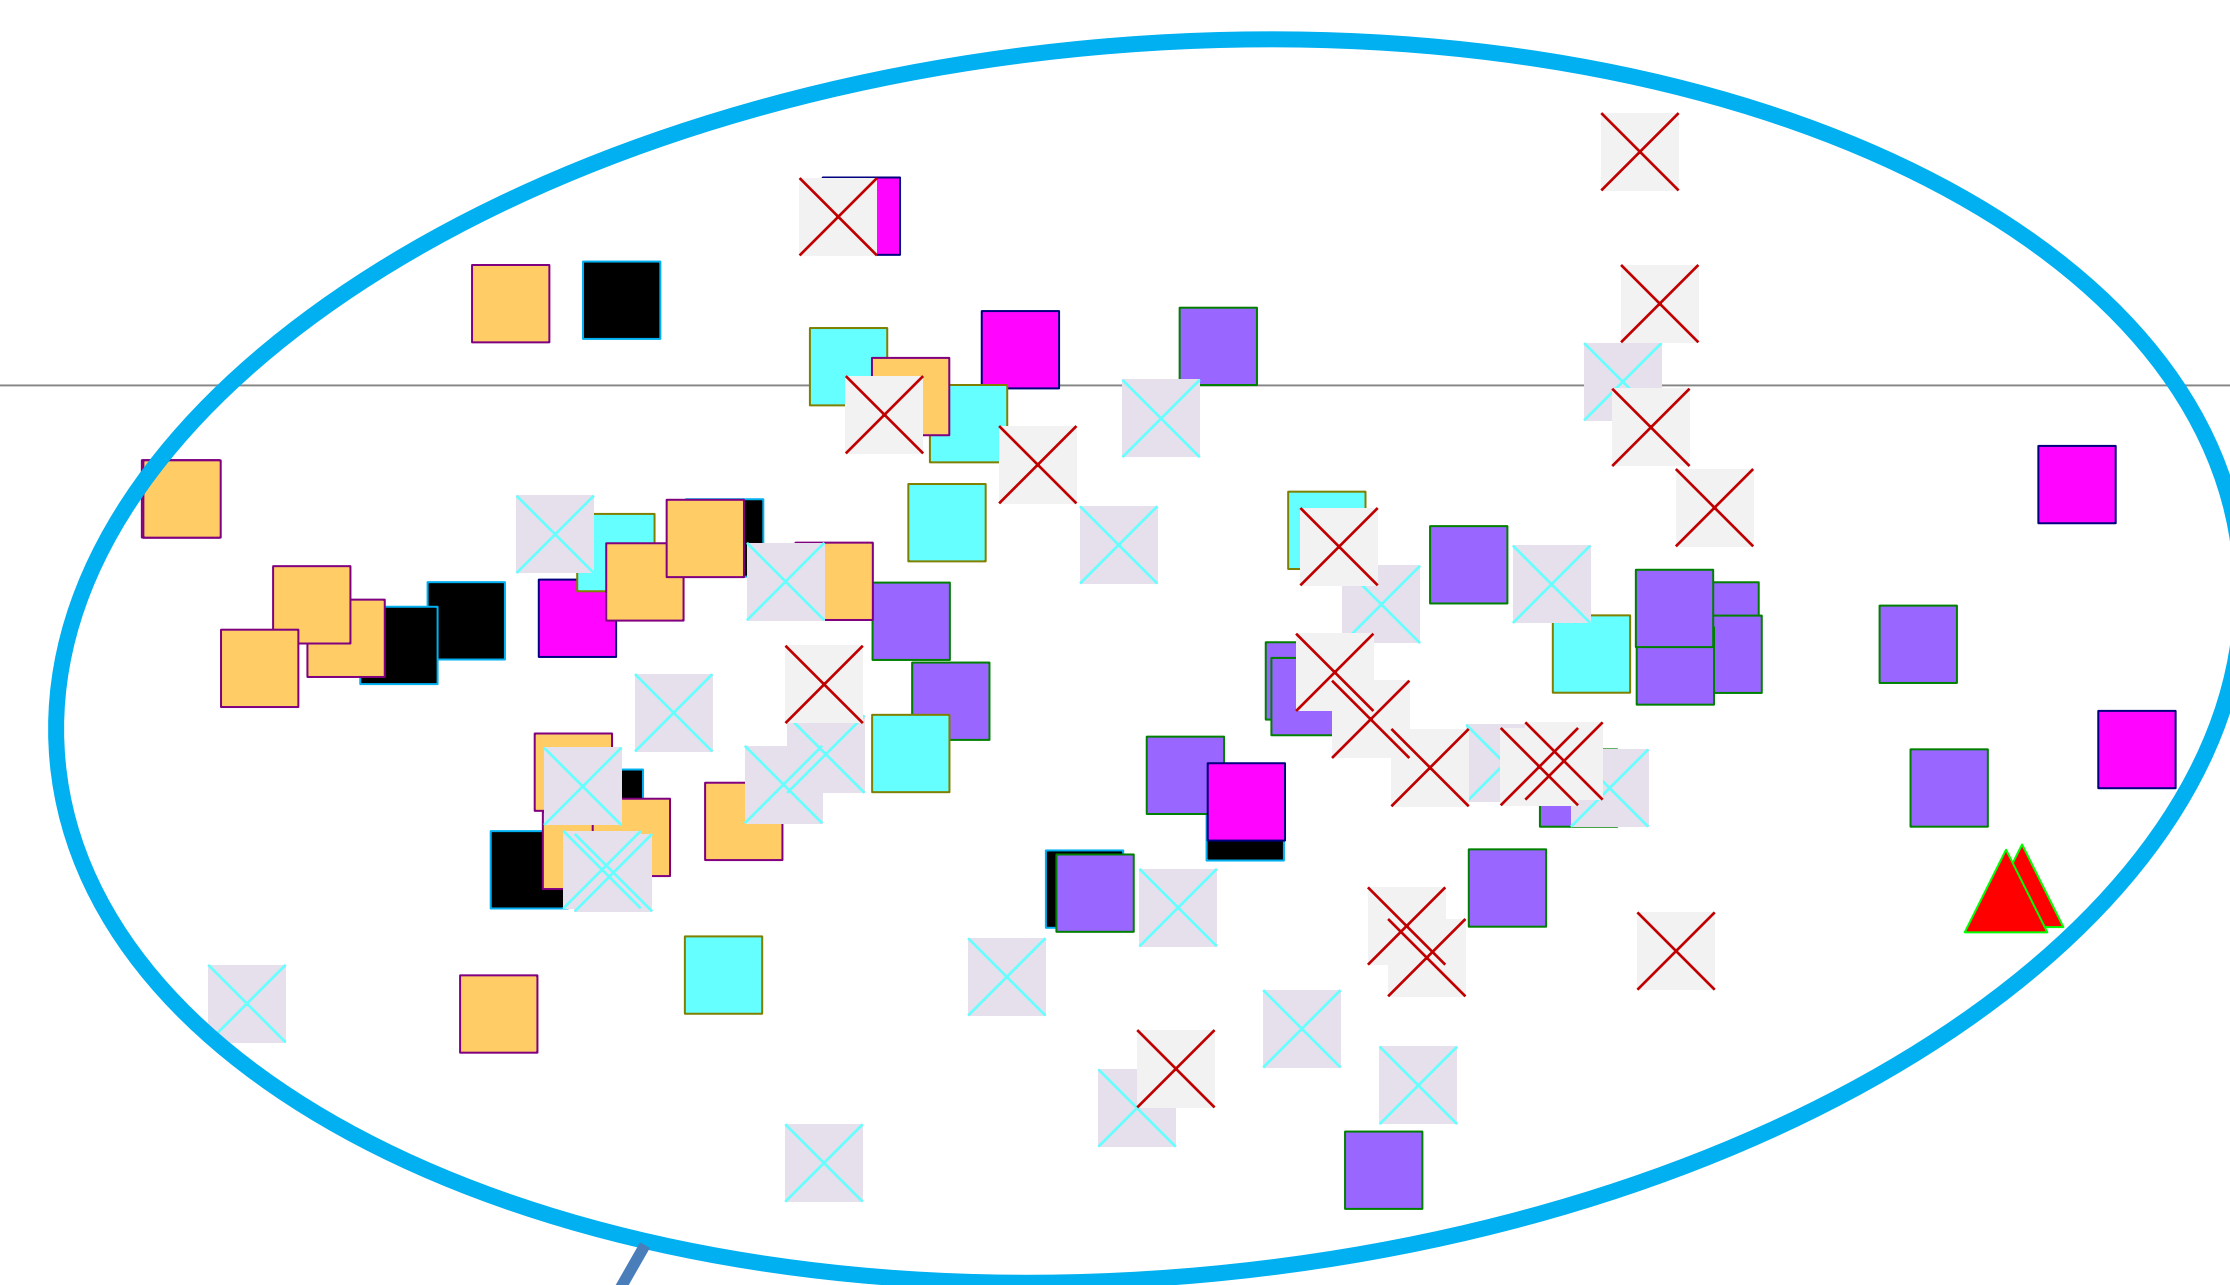

PHI, JV, BN, SW, KN,  
SbLr, Trop Jap

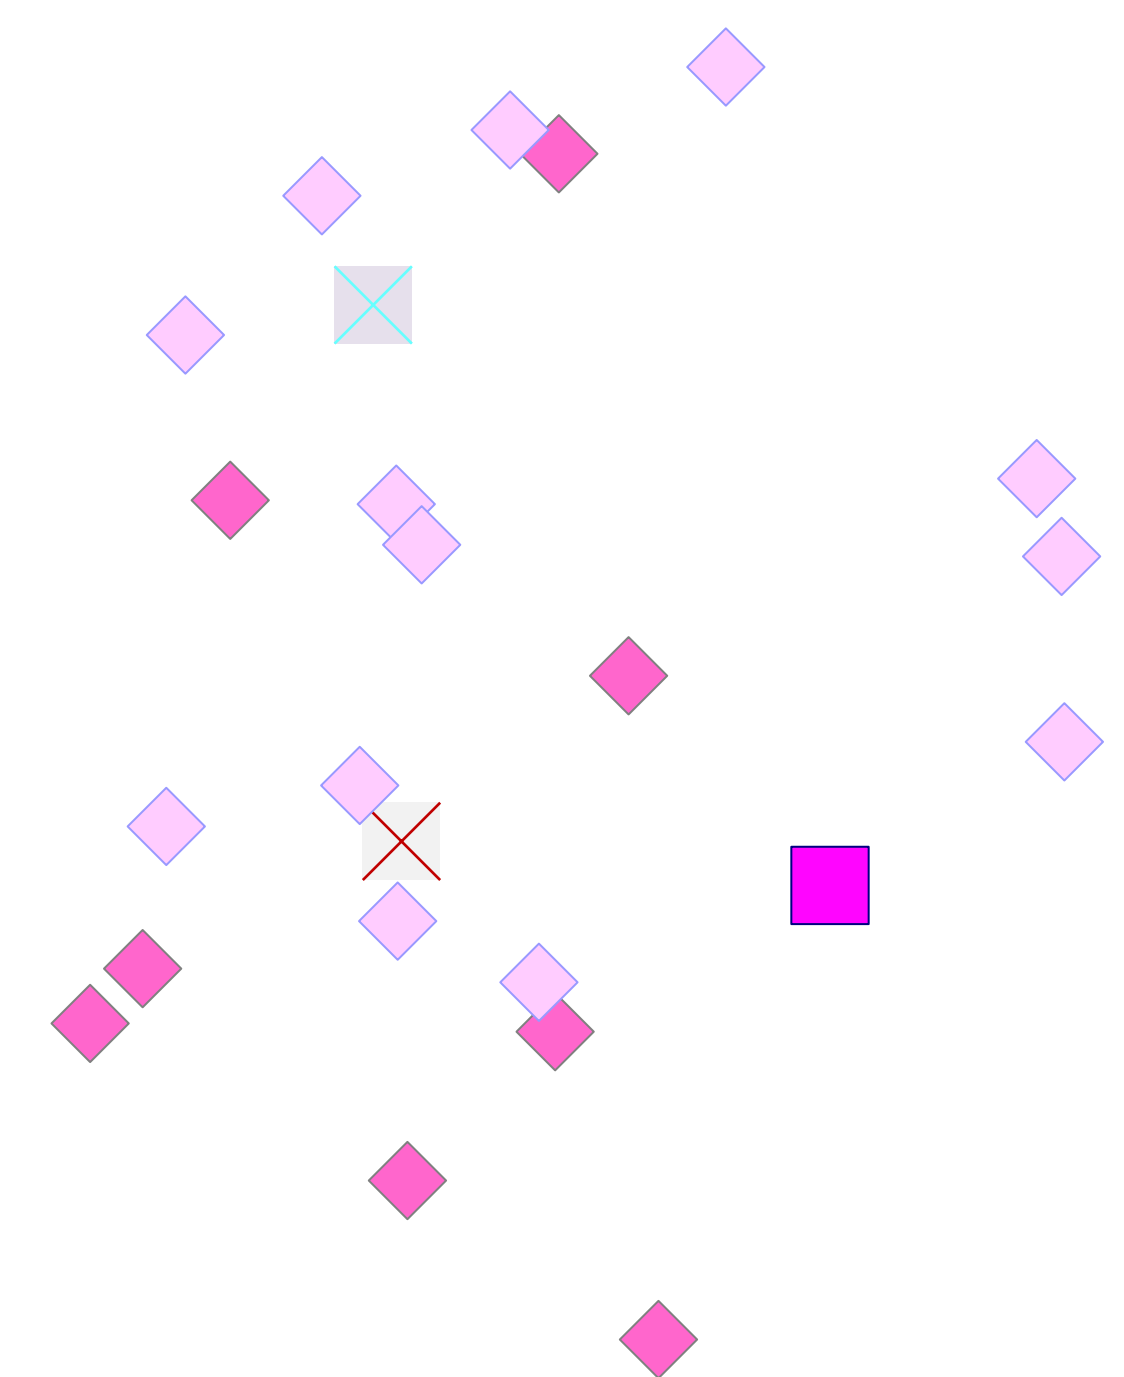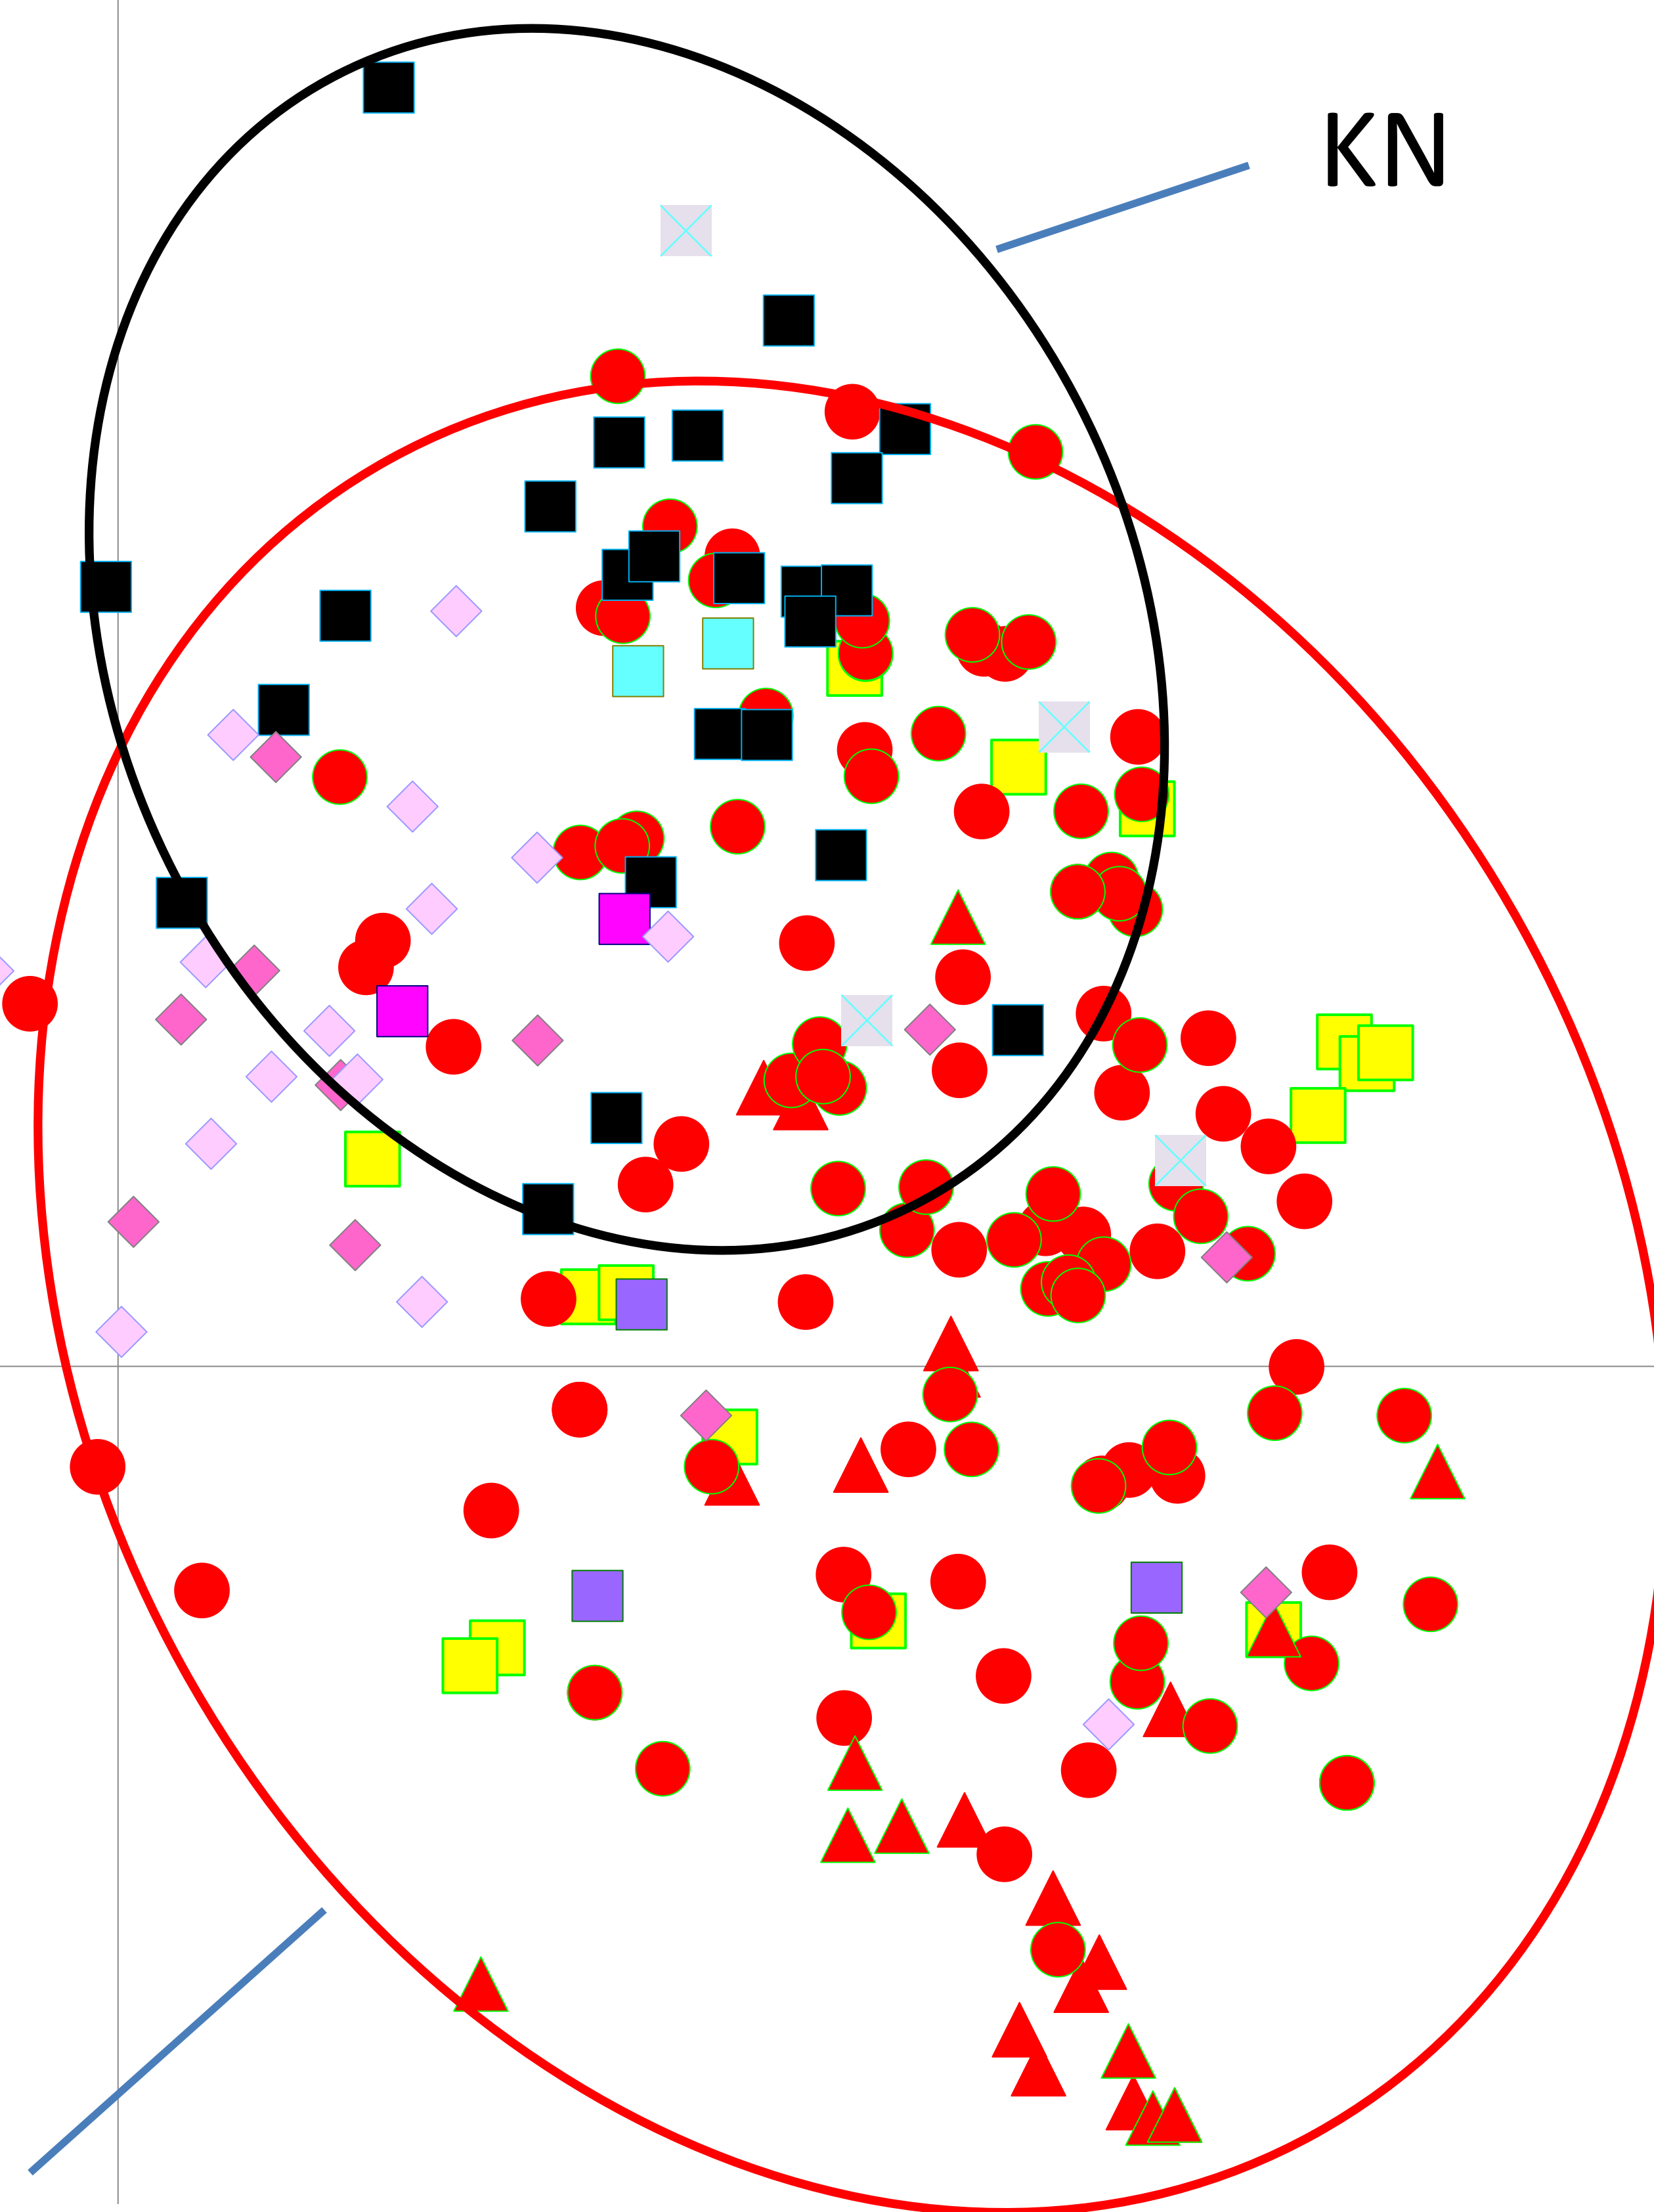

**SbCV, SbSH, SbSHA,  
SbBR, SbBRA**

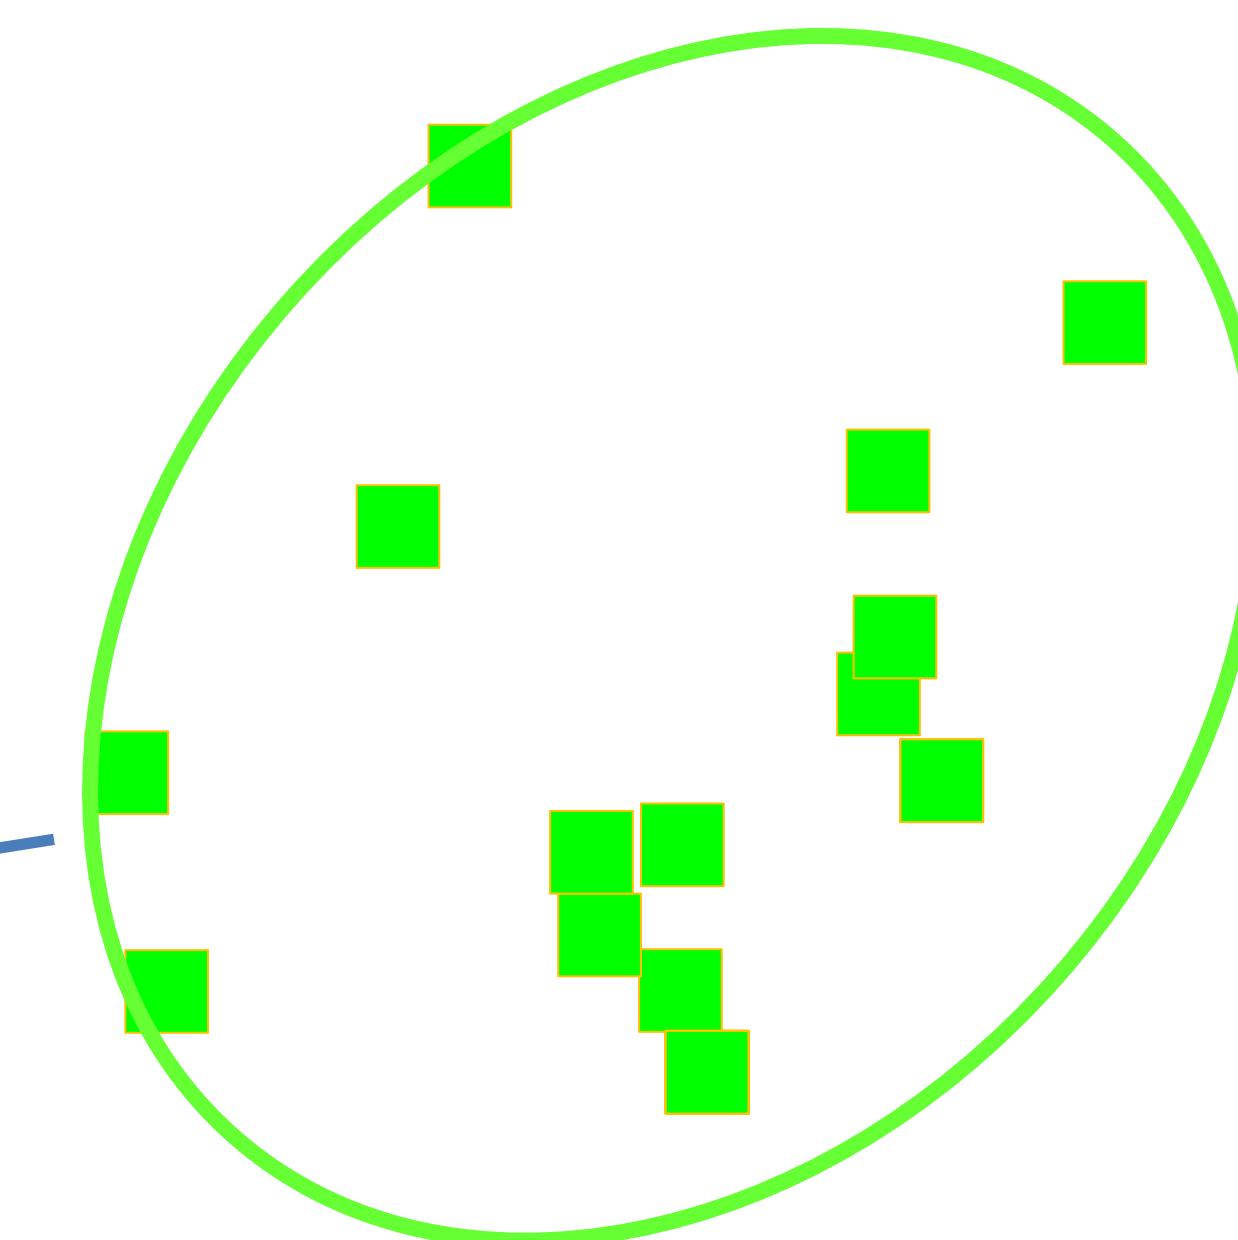

PMCV

- PMCV
- SbCV
- SbSH
- SbSHA
- SbBR
- SbBRA
- KN
- PHI
- JV
- BN
- SW
- SbLr
- Trop jap
- PMOr
- SEAO

Coord. 1 (43.46%)
