# Supplementary material
Source: publisher figshare collection journal article supplement (https://gsajournals.figshare.com/articles/dataset/_/8268167)
Supplement: Supplementary file 4 [file 1]

(A)

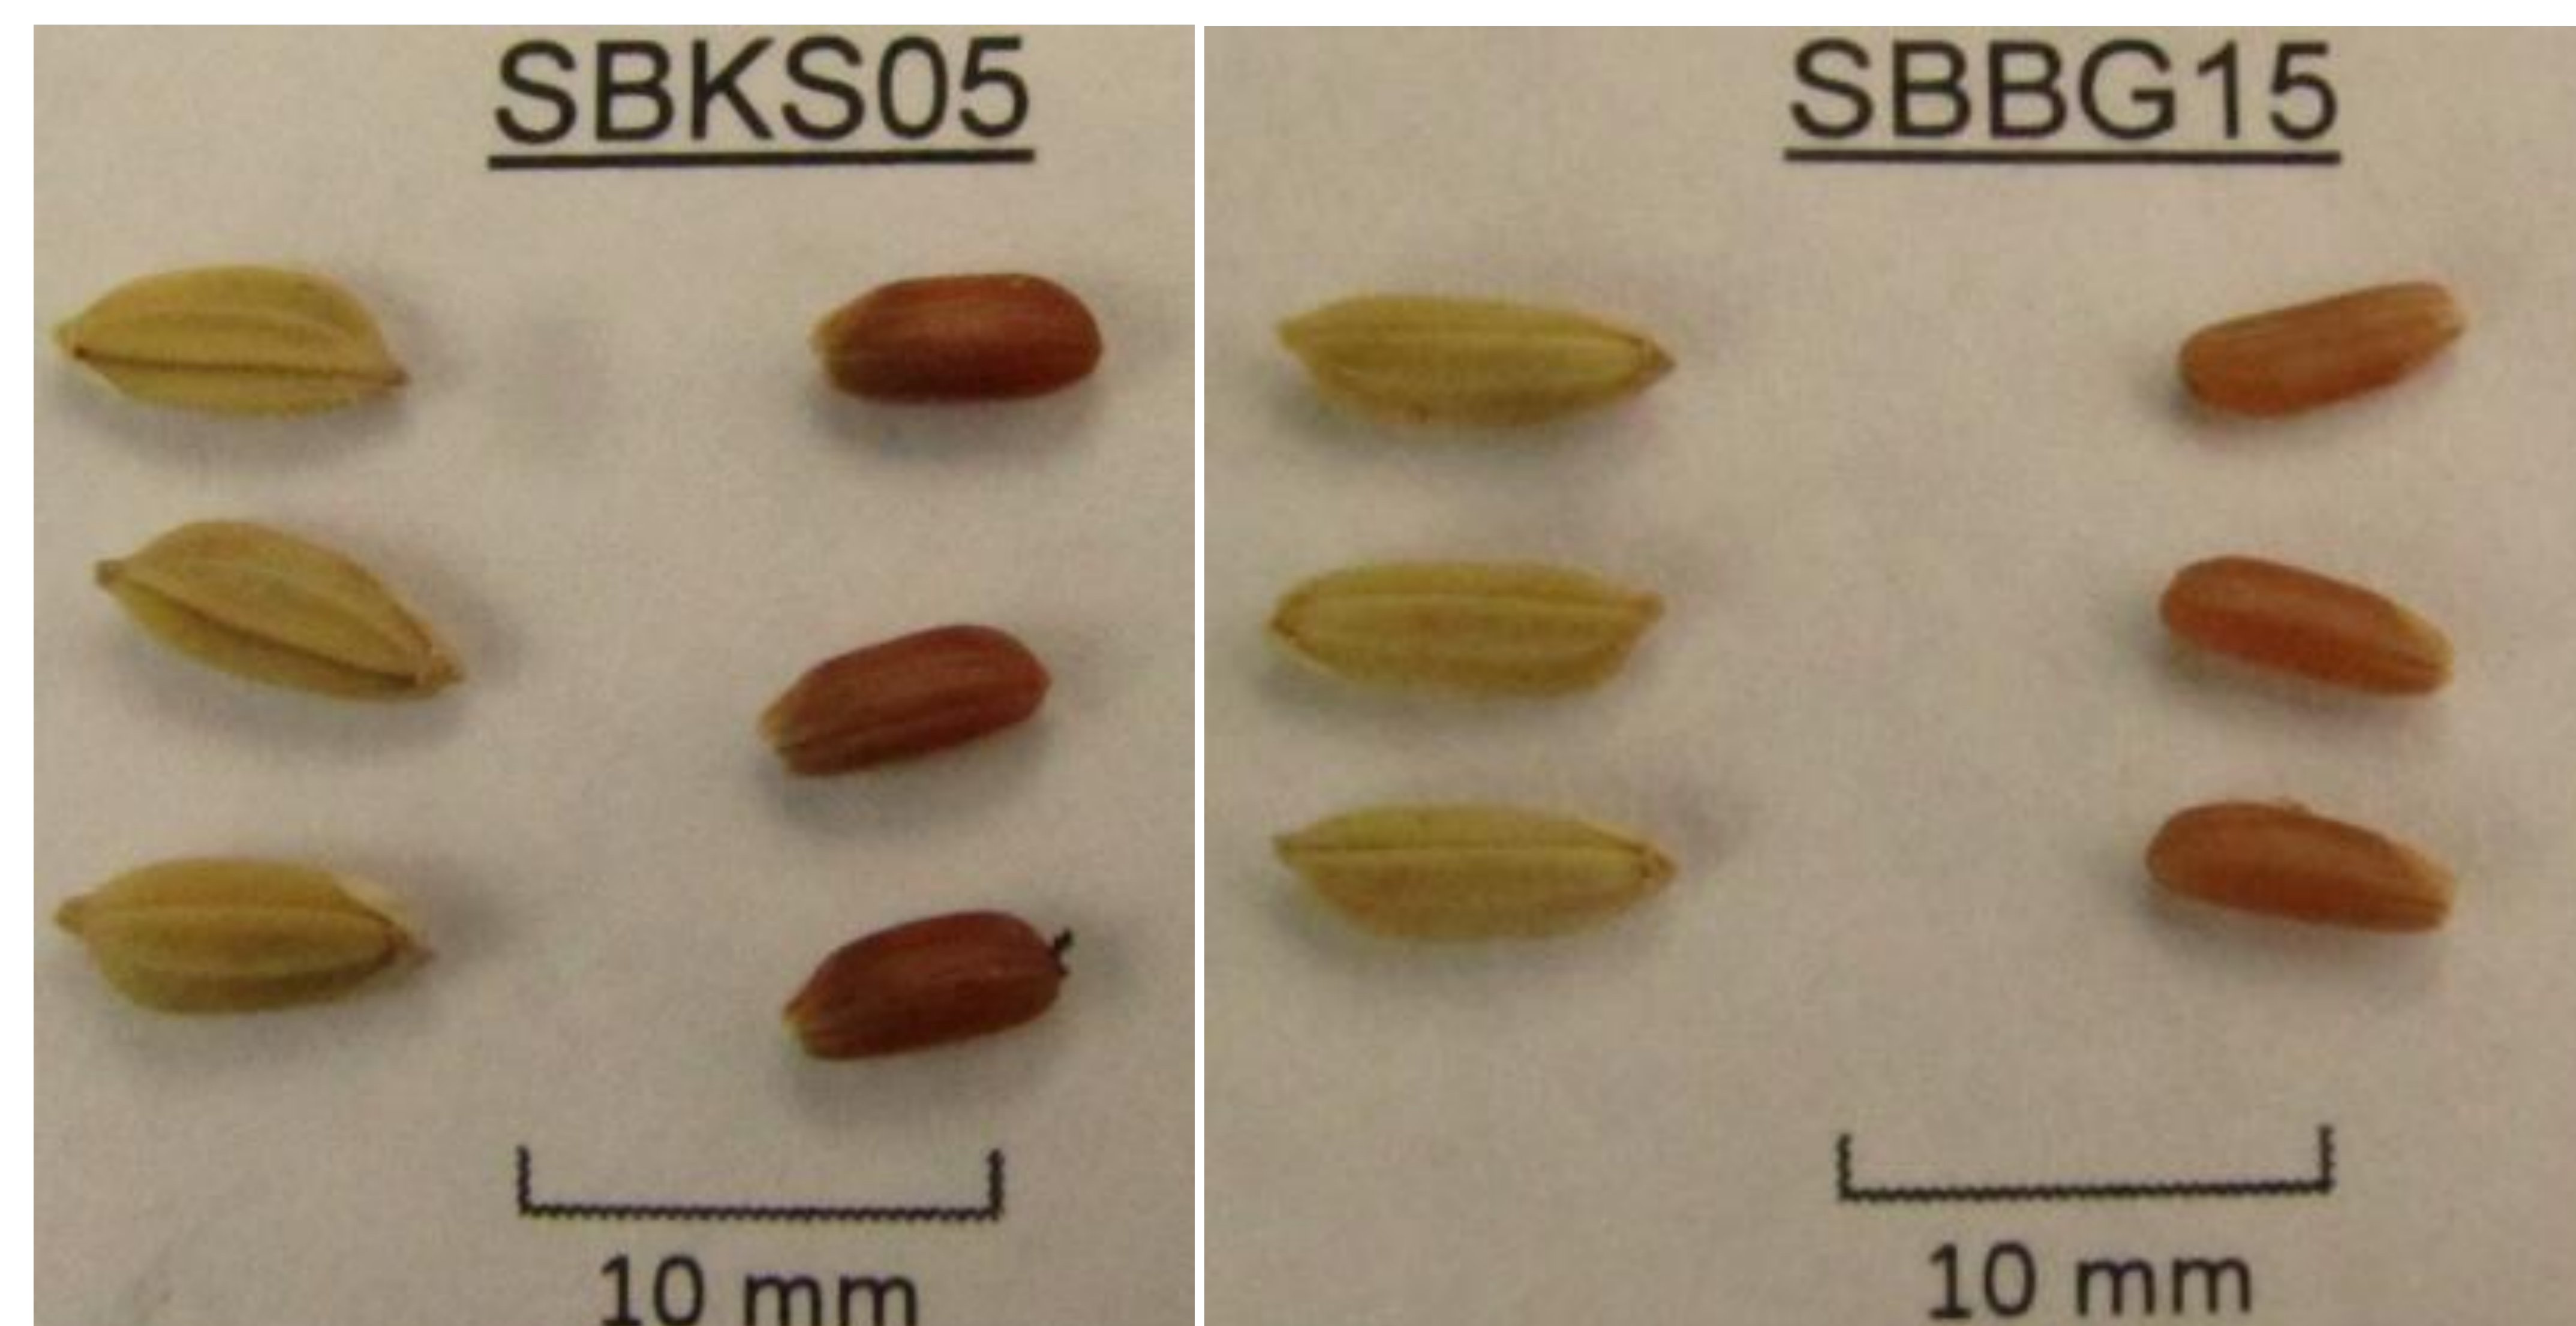

SH-SBKS05

SH-SBBG15

(B)

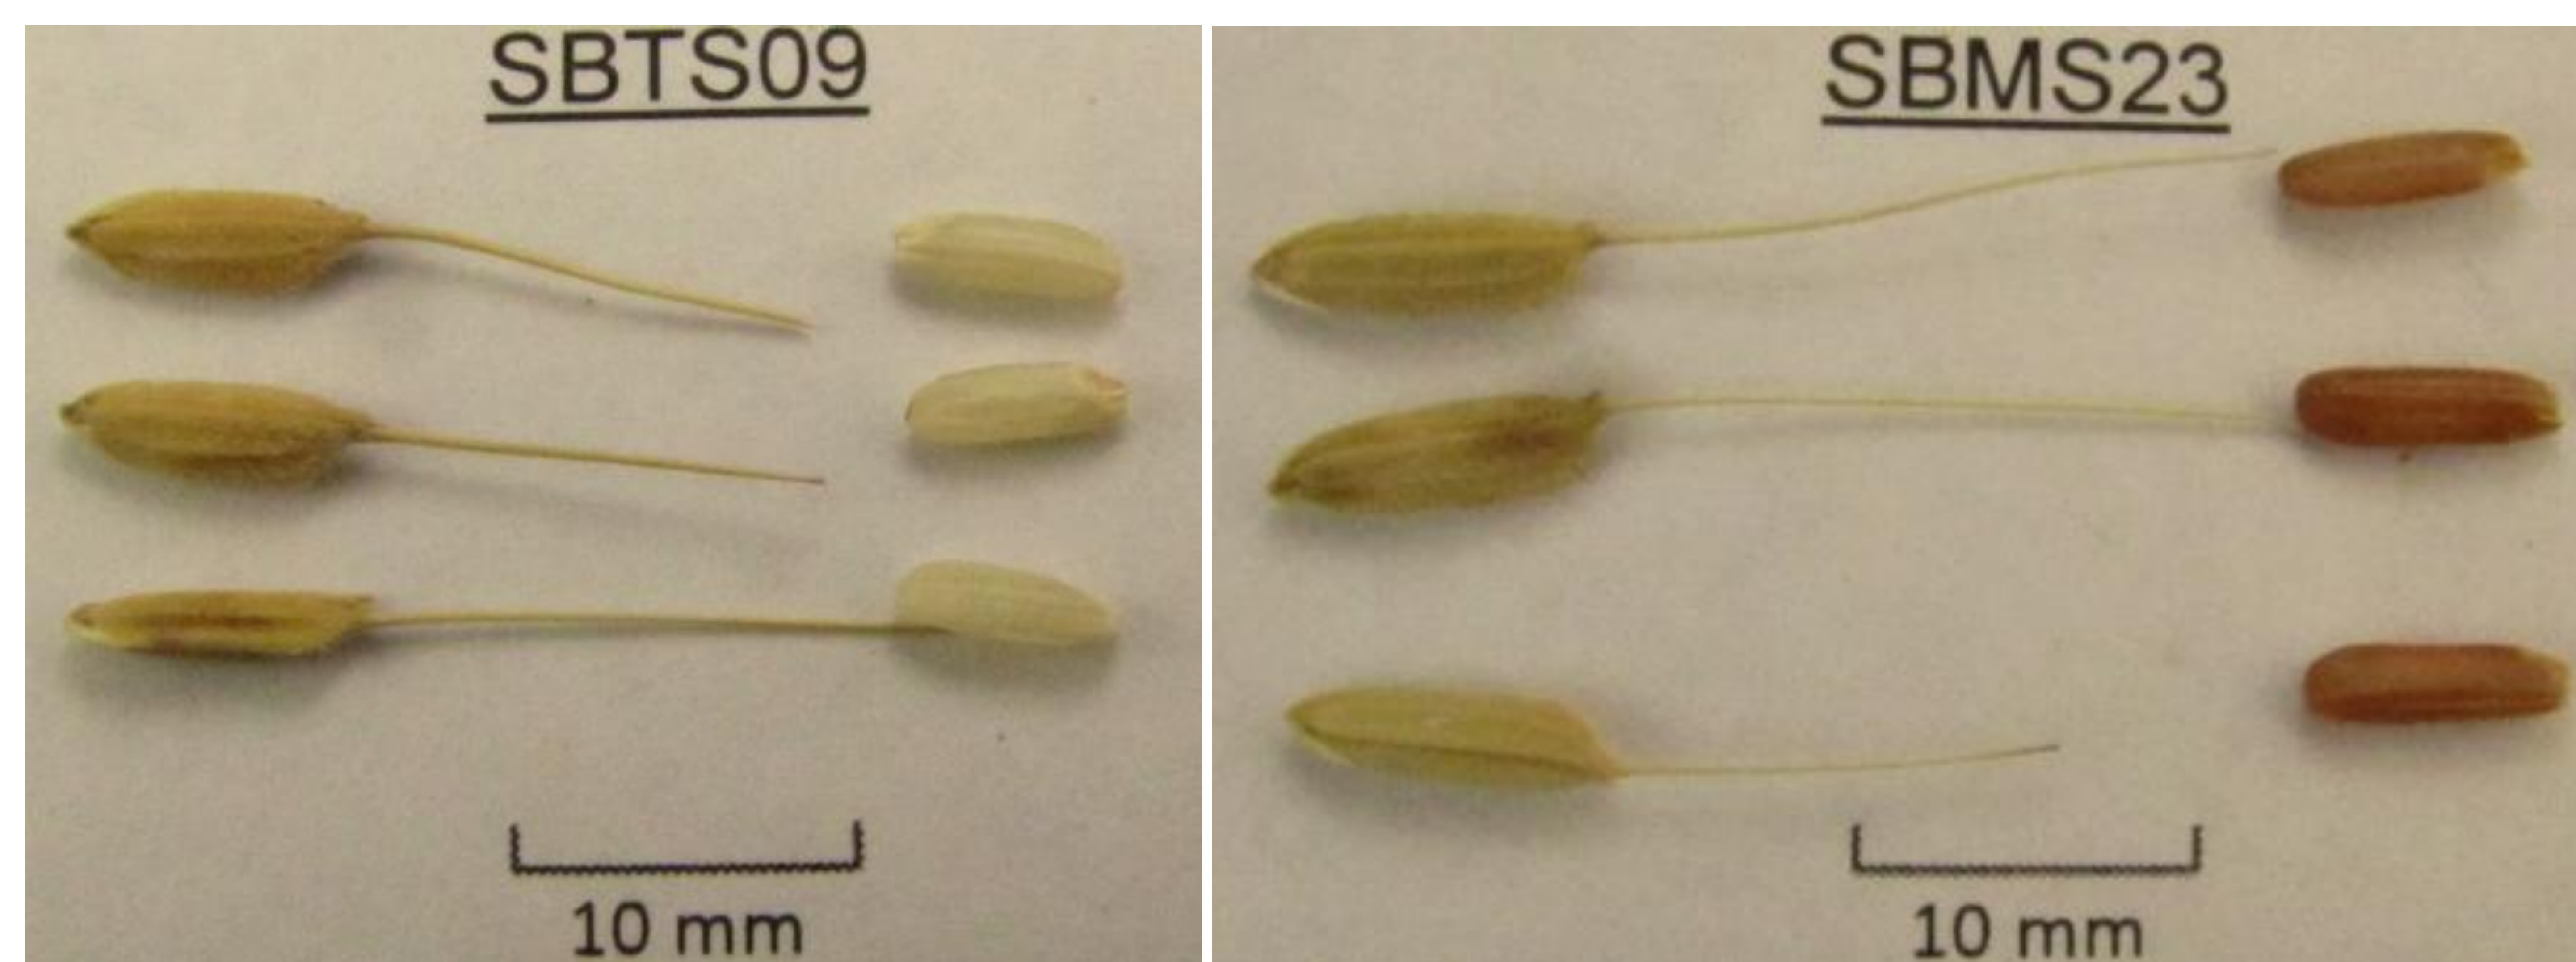

SHA-SBTS09

SHA-SBMS23

(C)

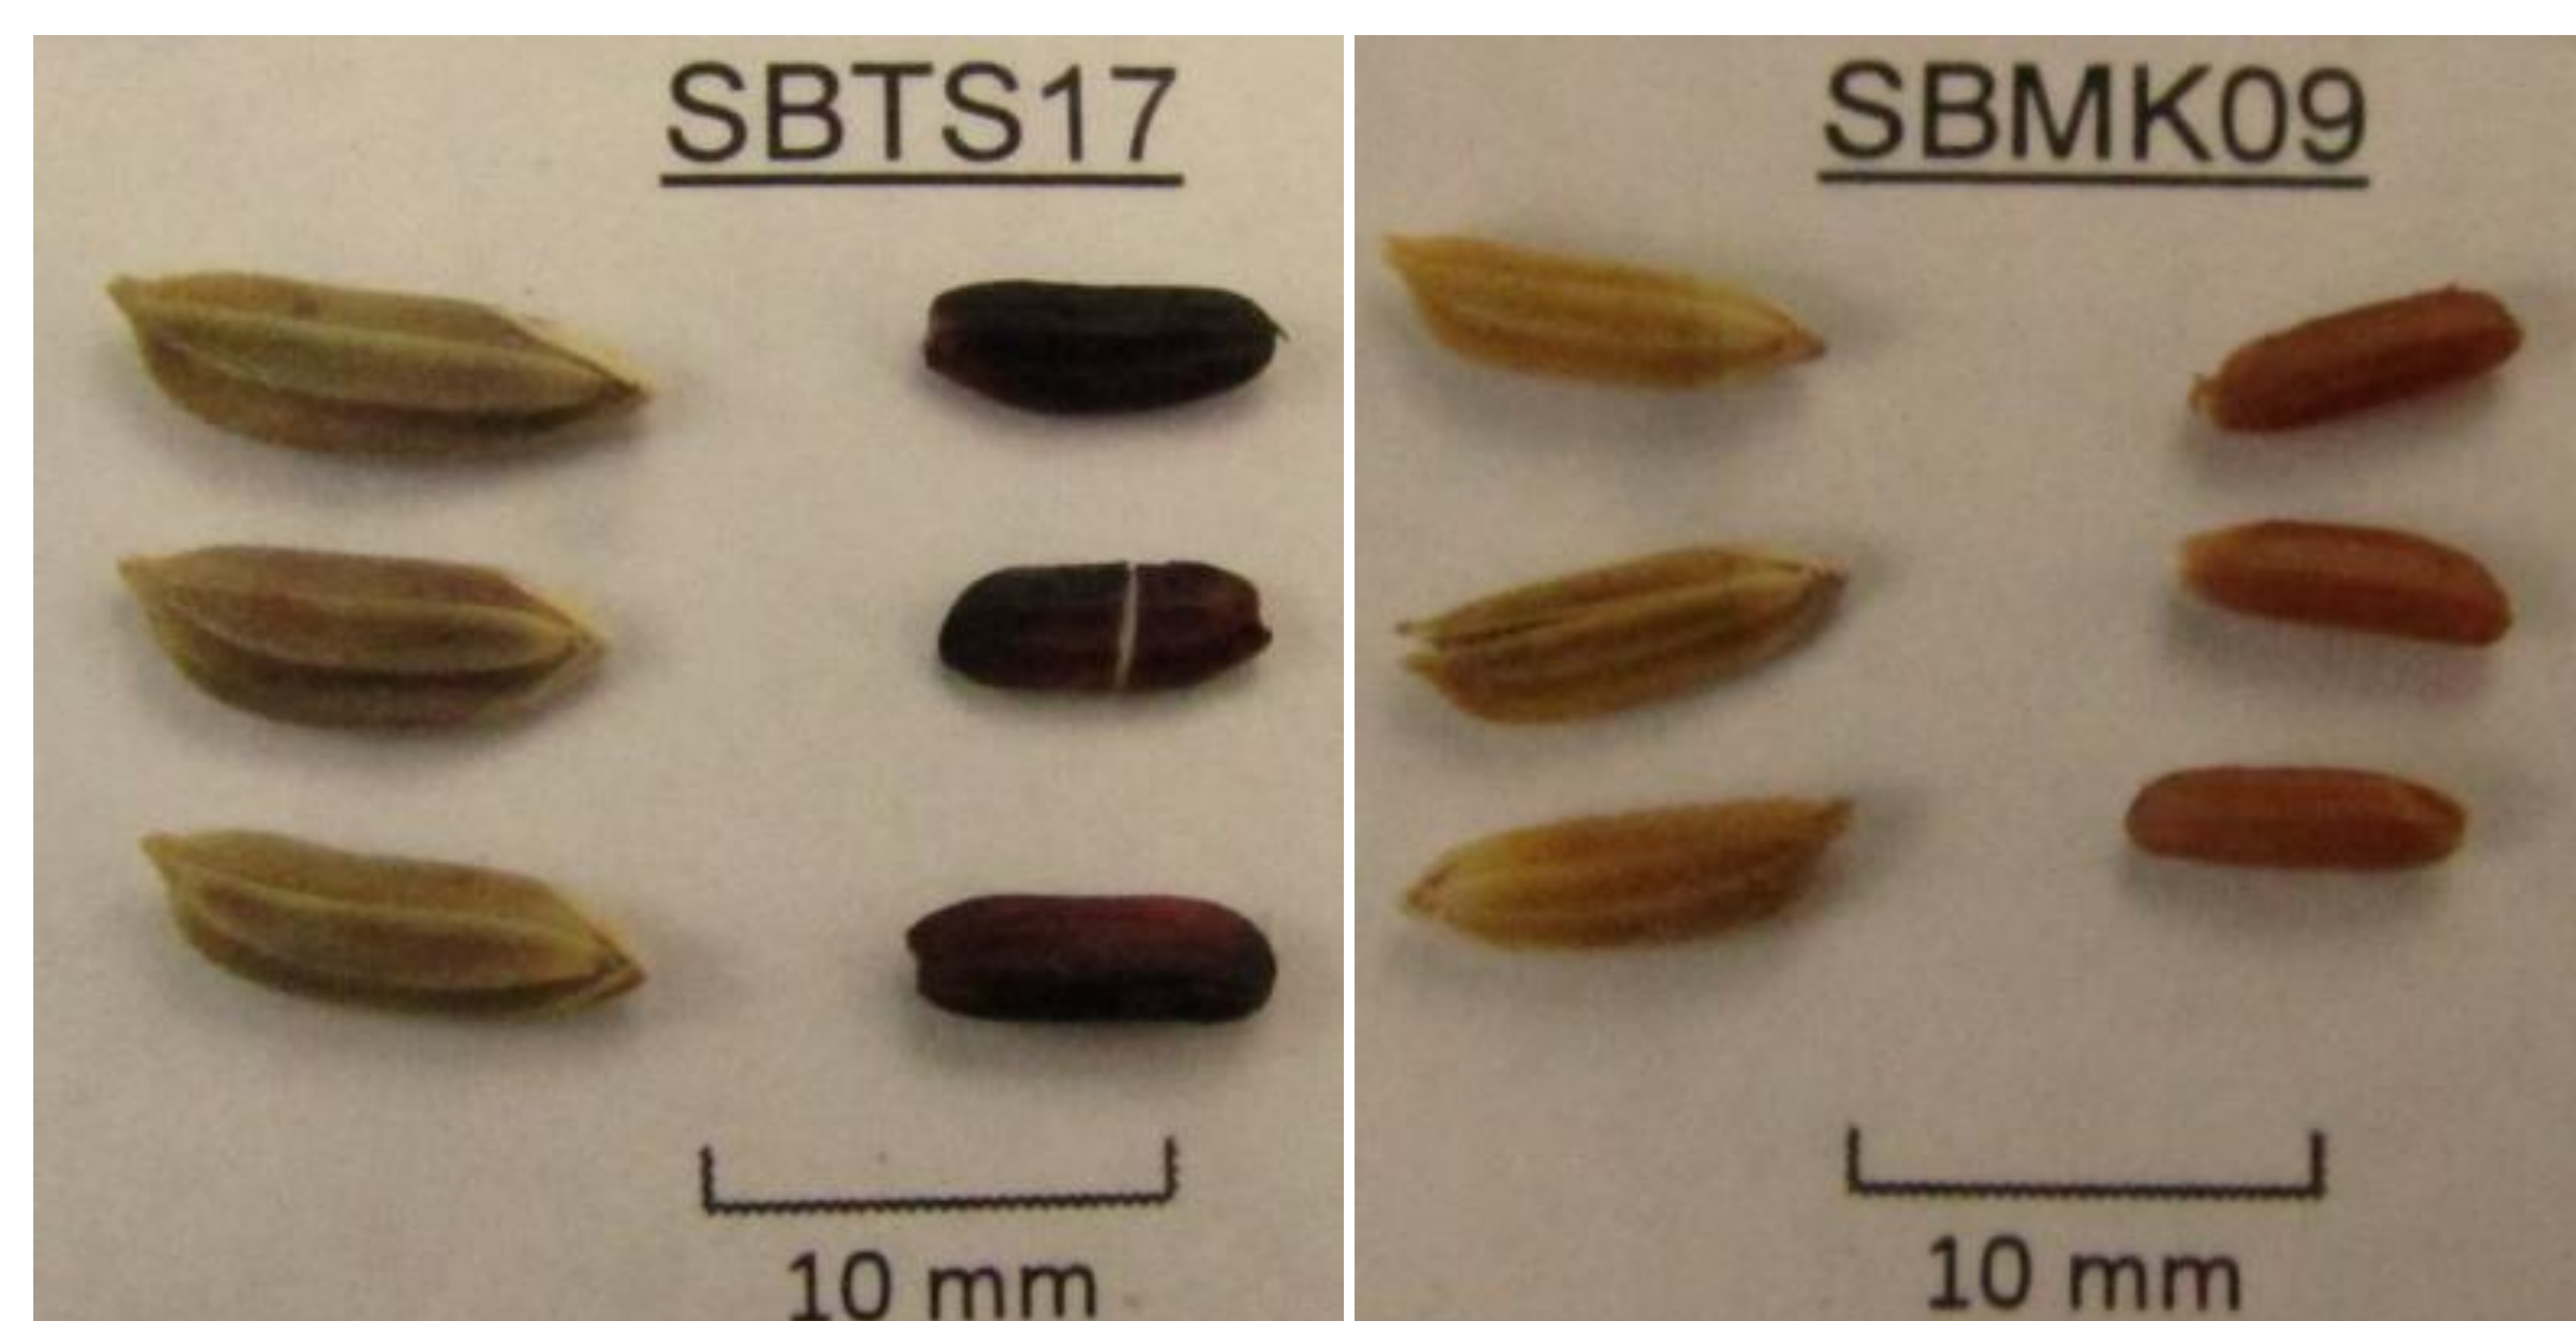

BR-SBTS17

BR-SBMK09

(D)

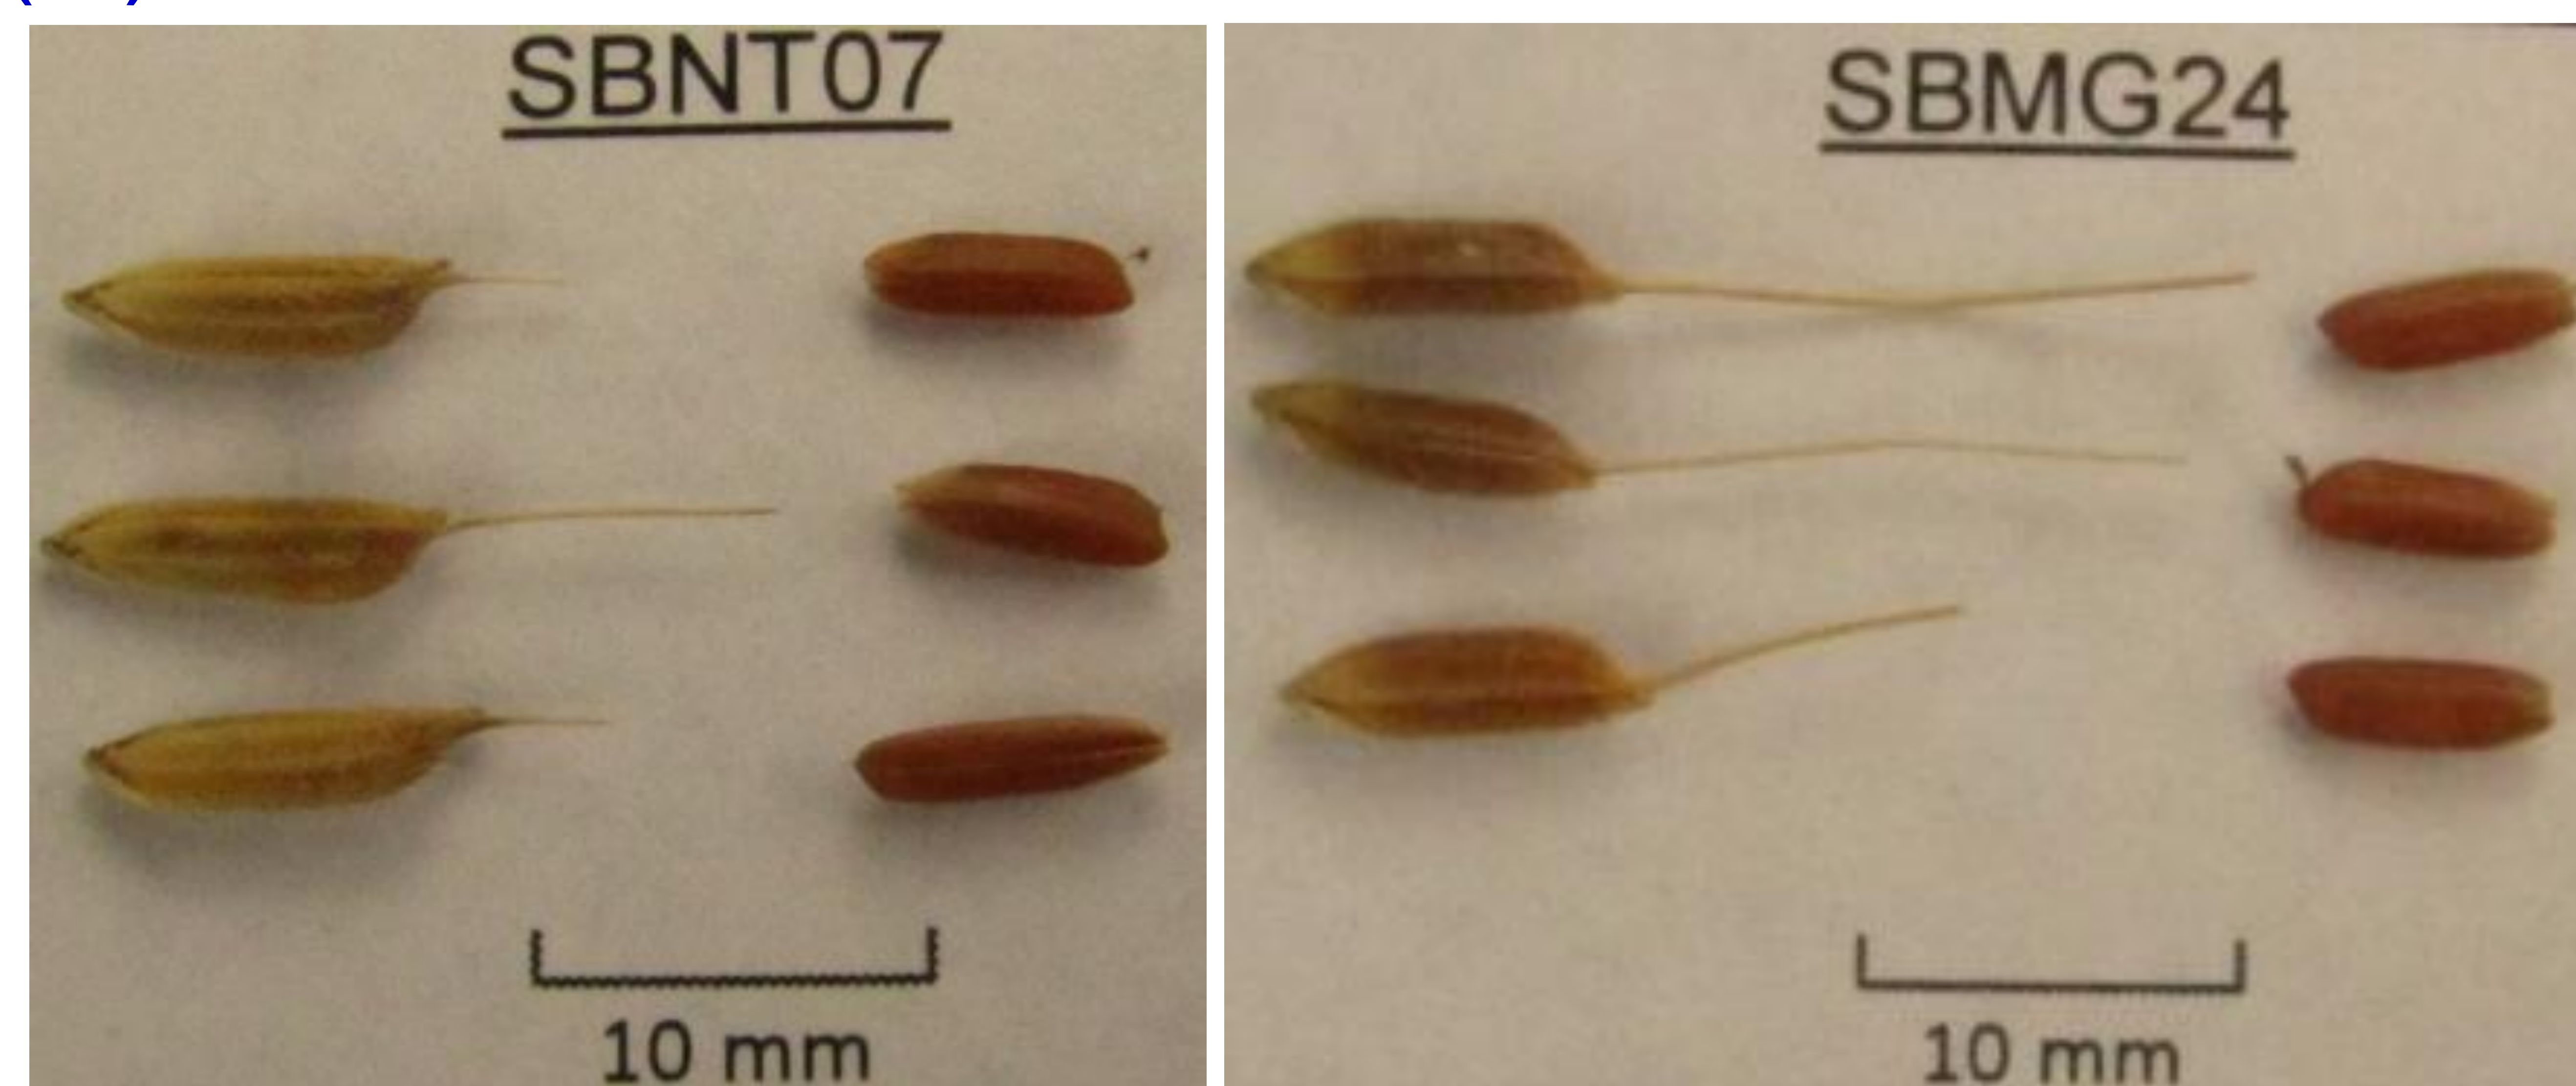

BRA-SBNT07

BRA-SBLB24

(E)

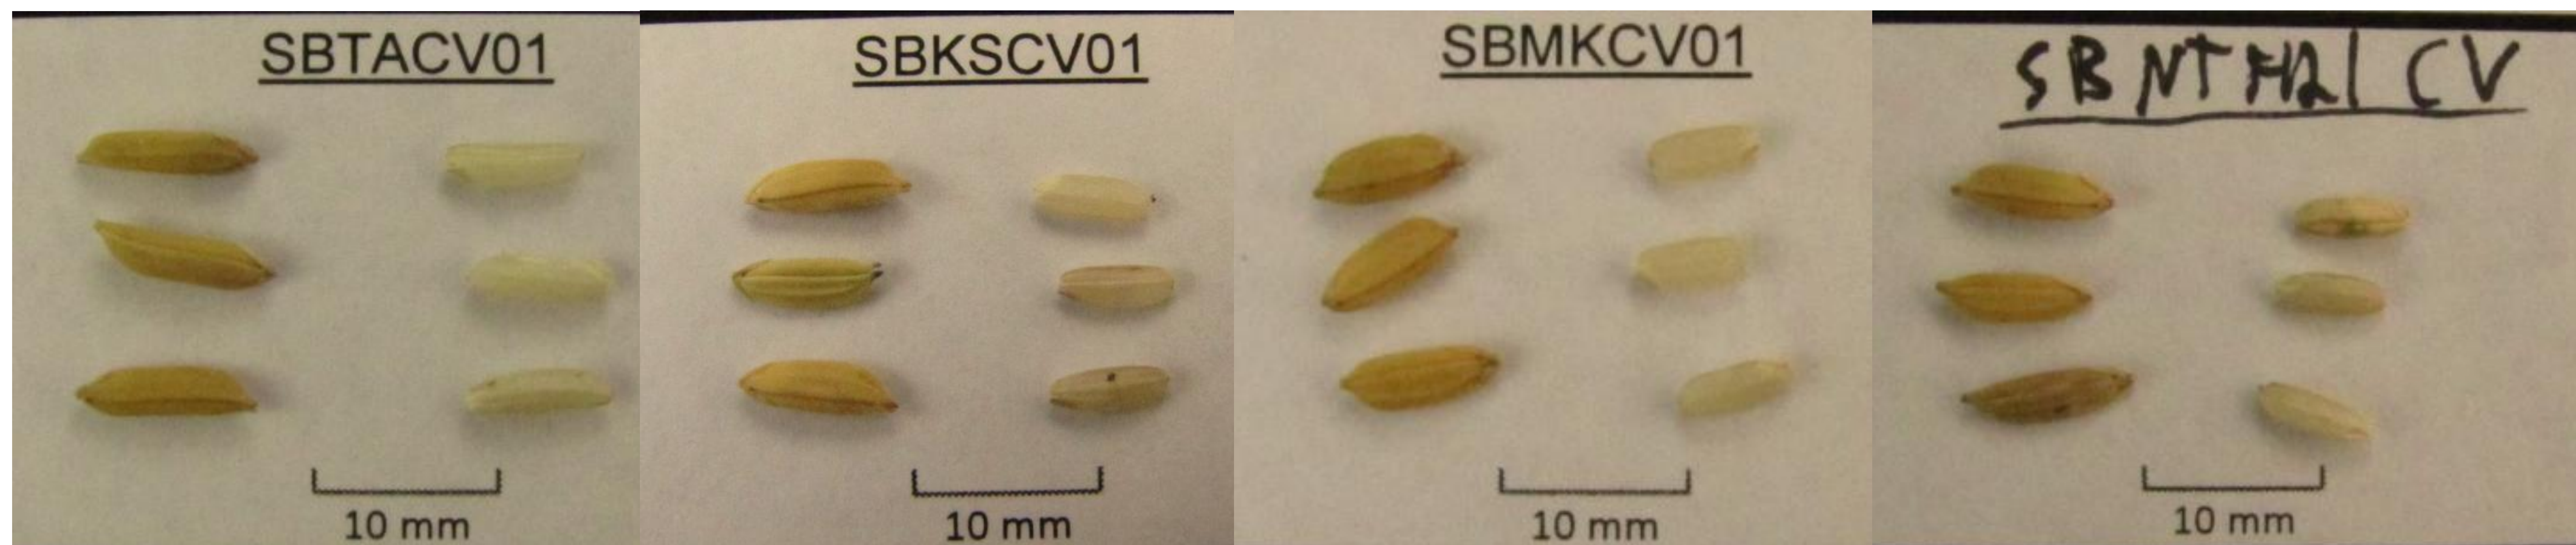

SH-SBTACV01

SH-SBKSCV01

SH-SBMKCV01

SH-SBNTCV01
