# Supplementary material
Source: publisher figshare collection journal article supplement (https://gsajournals.figshare.com/articles/dataset/_/8268167)
Supplement: Supplementary file 5 [file 1]

(2E)

K = 10, run 46

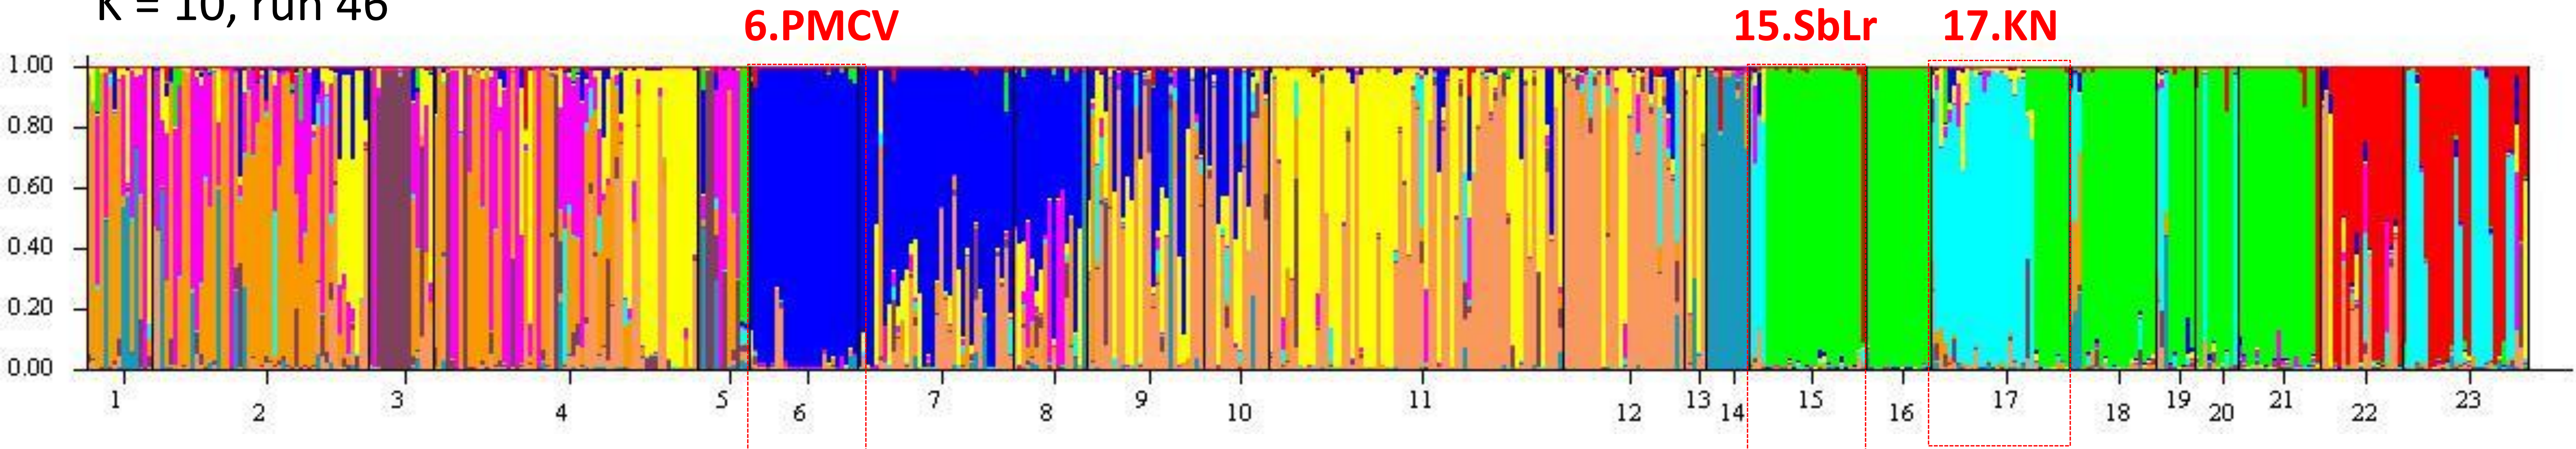

K = 10, run 49

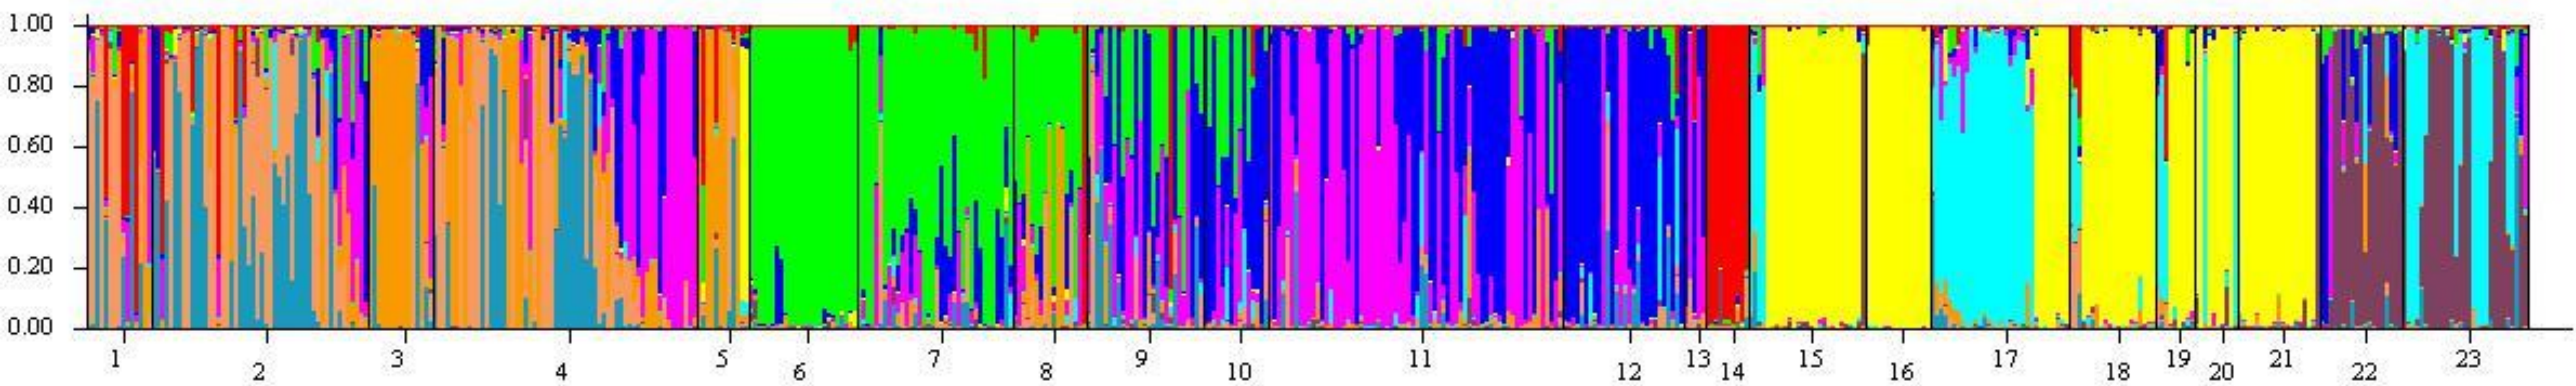

1. SbCV 2.SbSH 3.SbSHA 4.SbBR 5. SbBRA  
6.PMCV 7.PMSH 8.PMSHA 9.PMmSH 10. PMmSHA 11.PMBR 12.PMBRA 13.PMBH 14.PMBHA  
15.SbLr 16.SW 17.KN 18.PHI 19.JV 20.BN 21.TropJap  
22. PMOr 23.SEAOr
