# Supplementary material
Source: publisher figshare collection journal article supplement (https://gsajournals.figshare.com/articles/dataset/_/8268167)

(S3B)

Coord. 2 (24.83%)

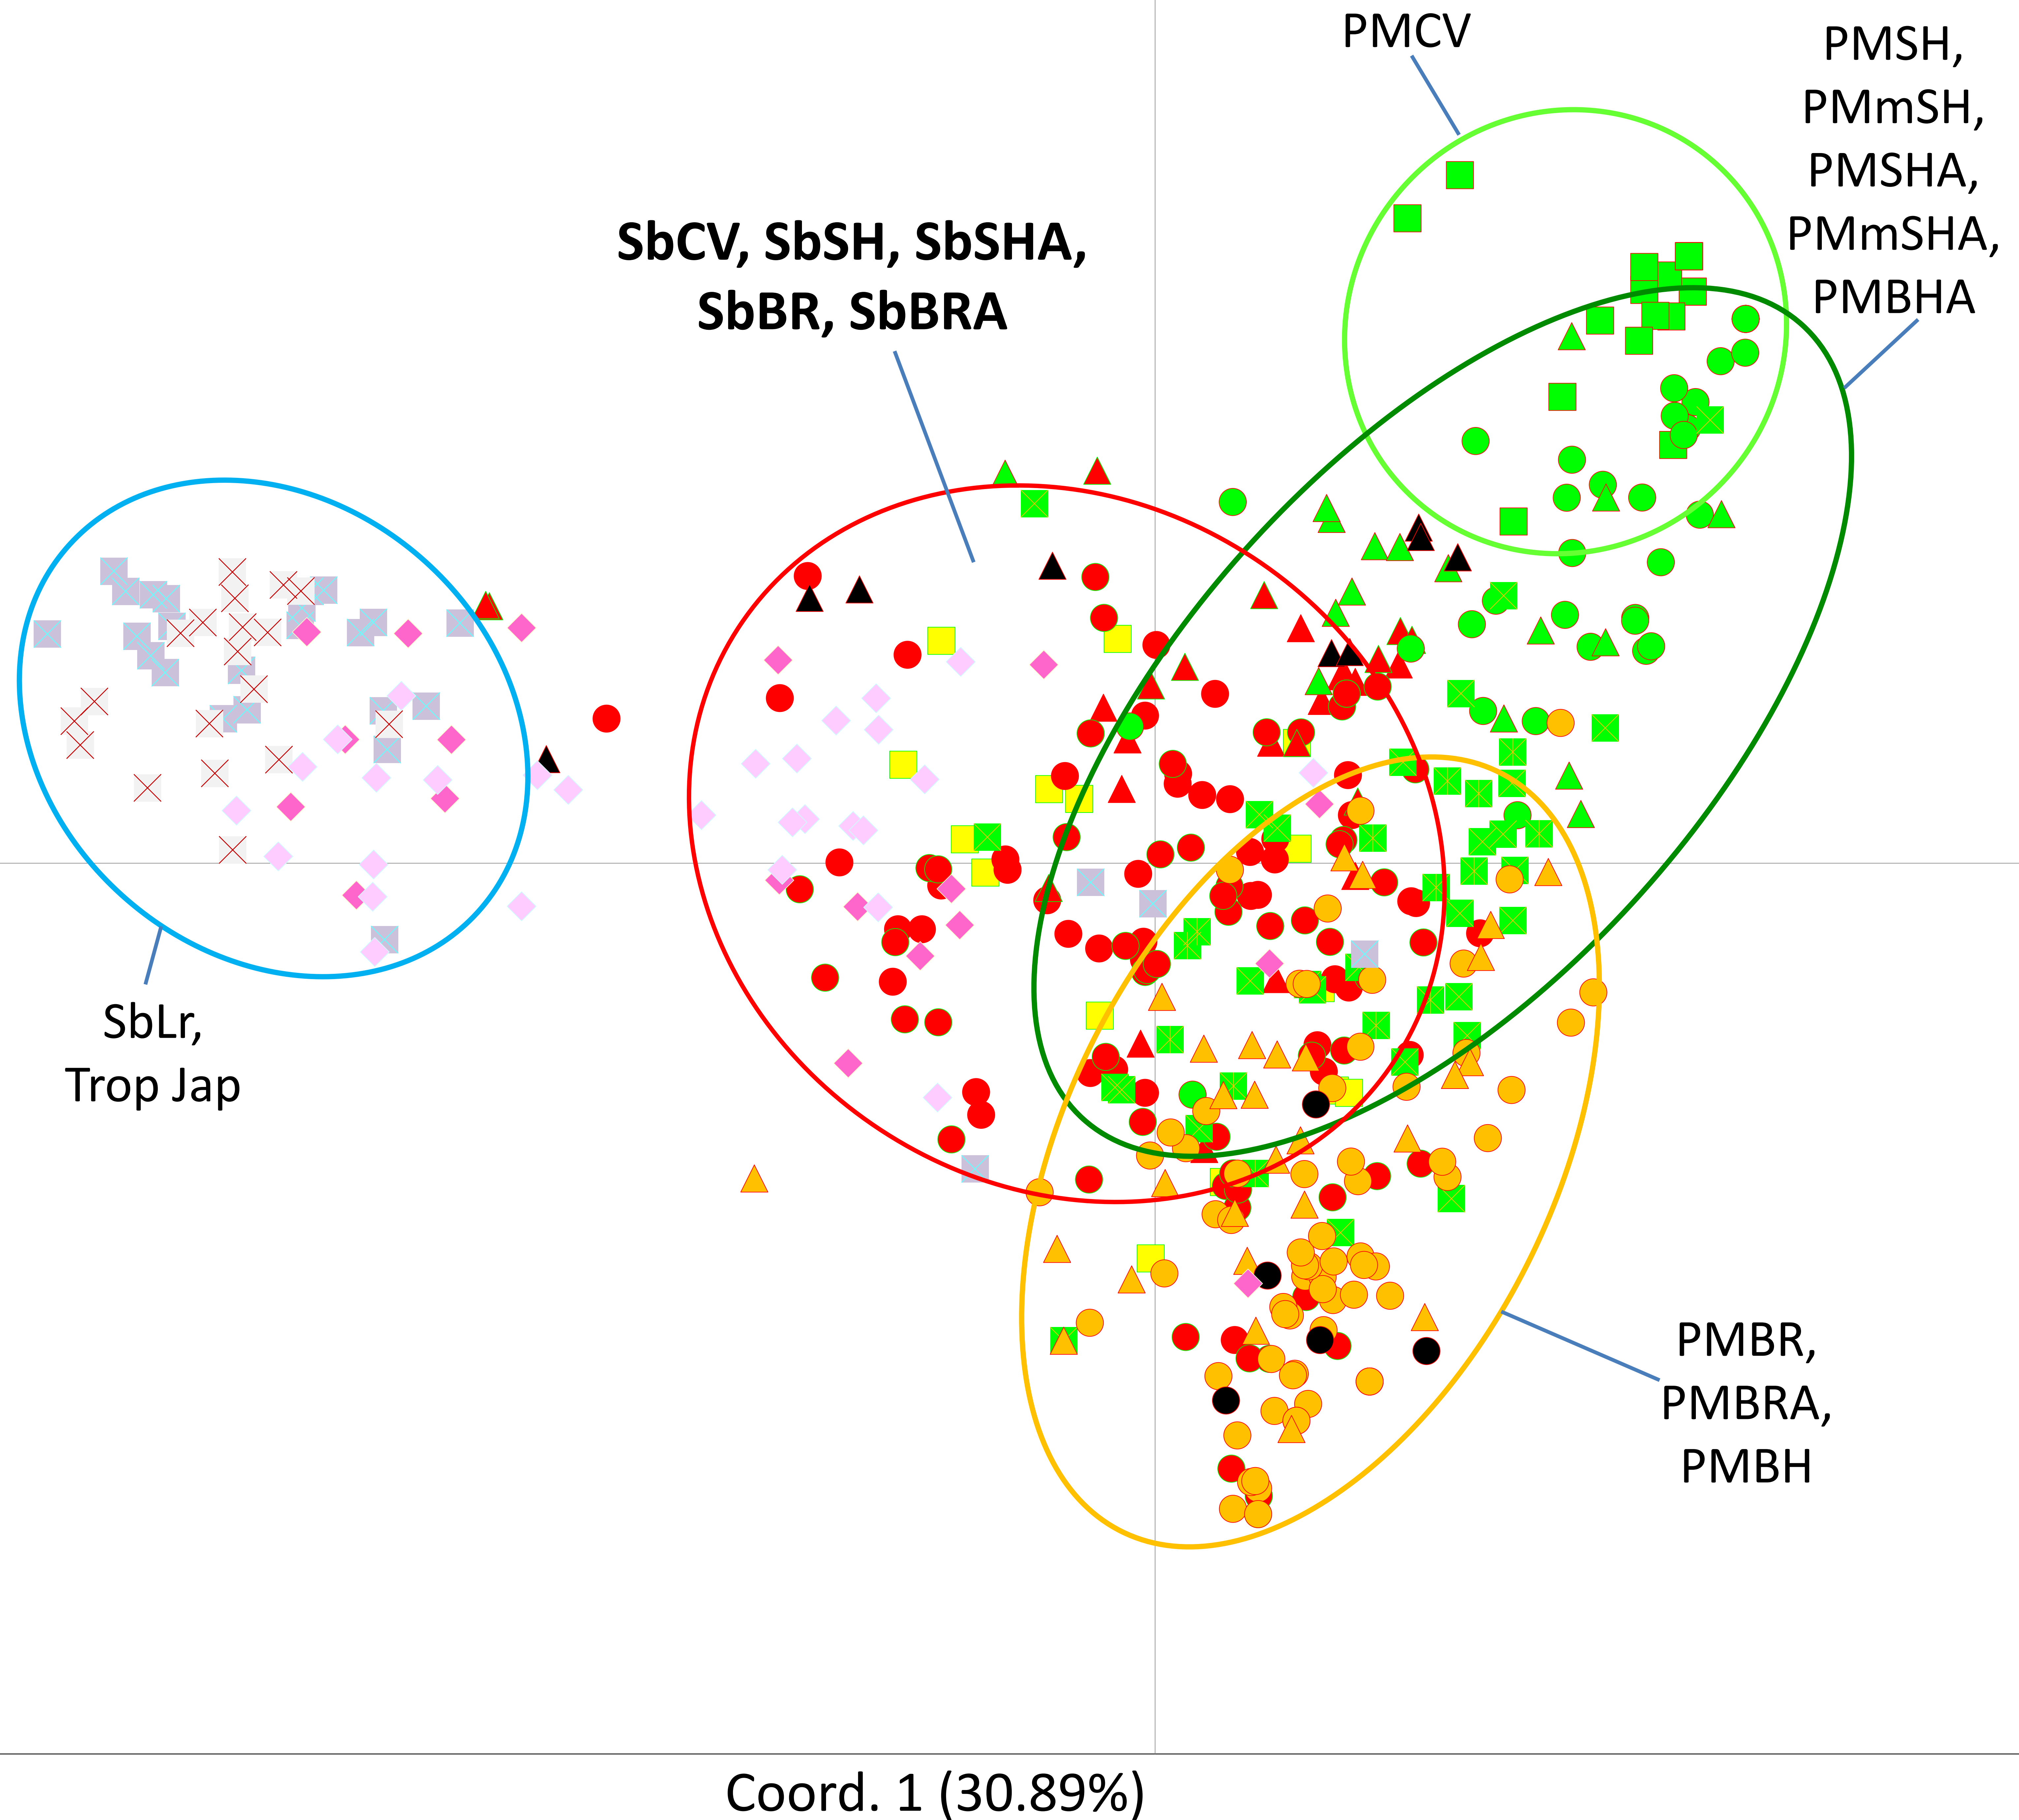

Supplement: Supplementary file 2 [file 1]

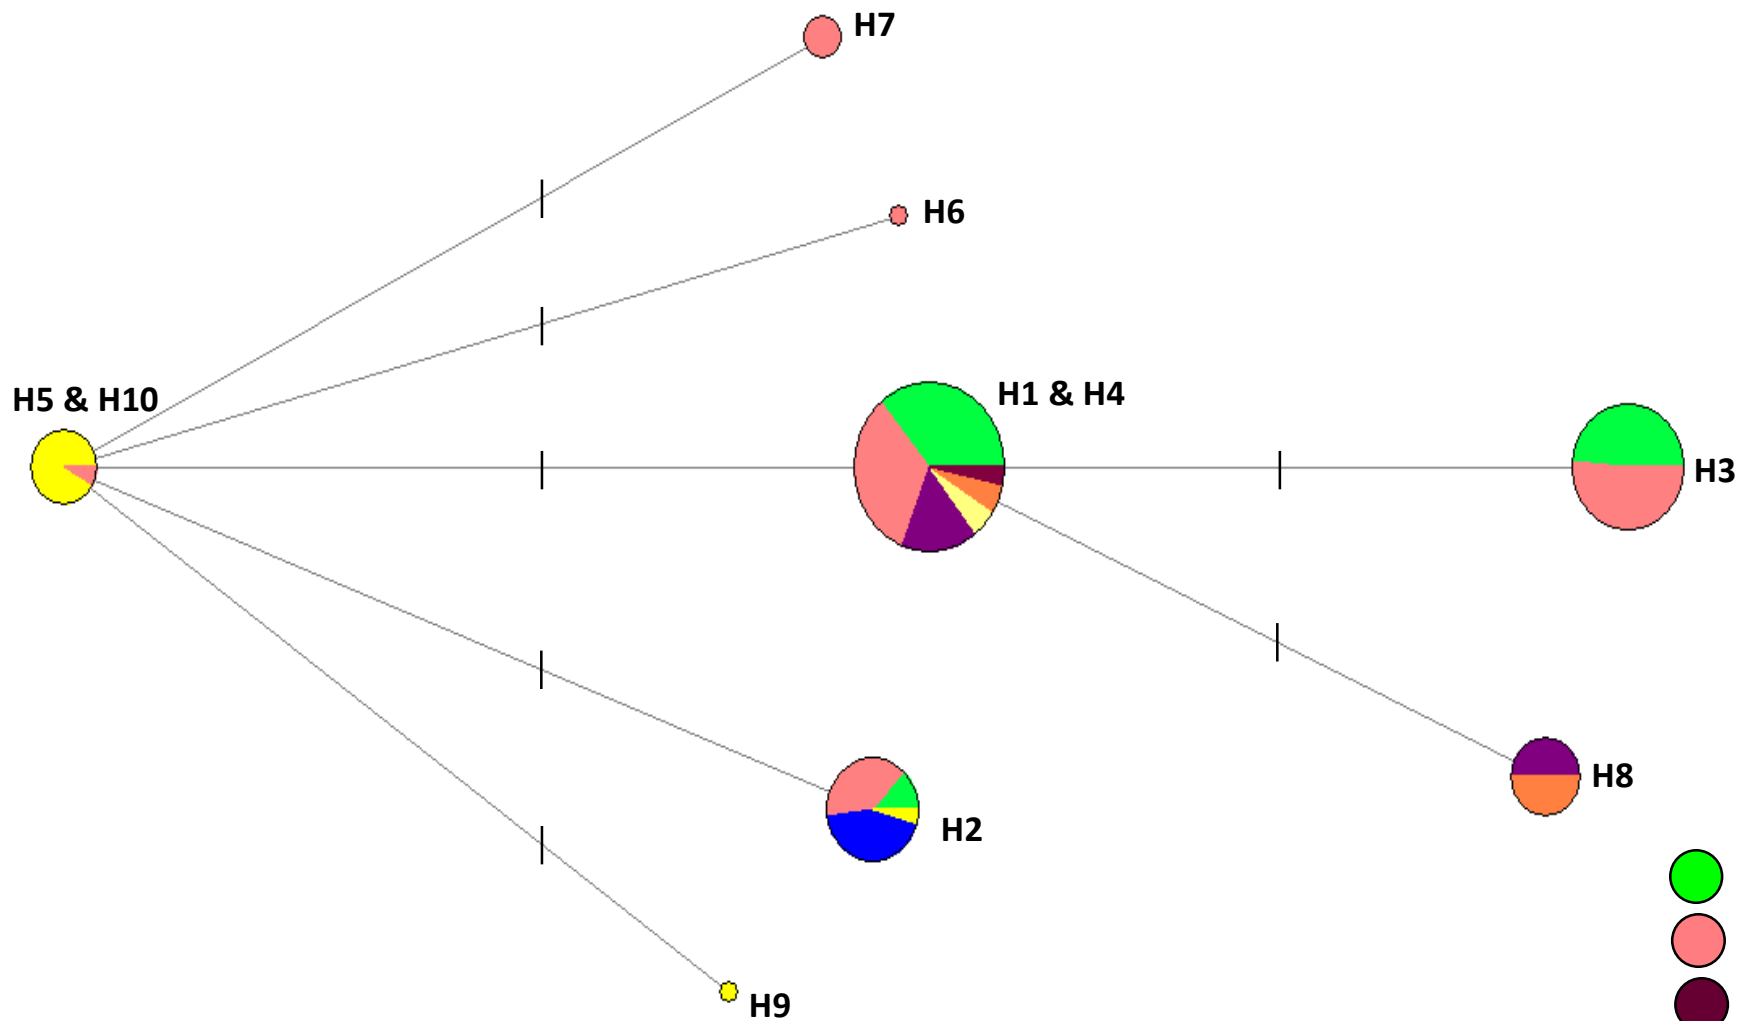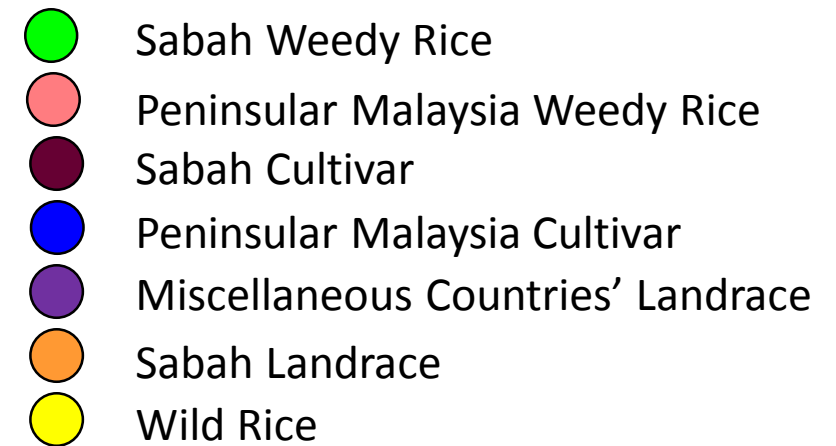

Supplement: Supplementary file 3 [file 1]

(2A)

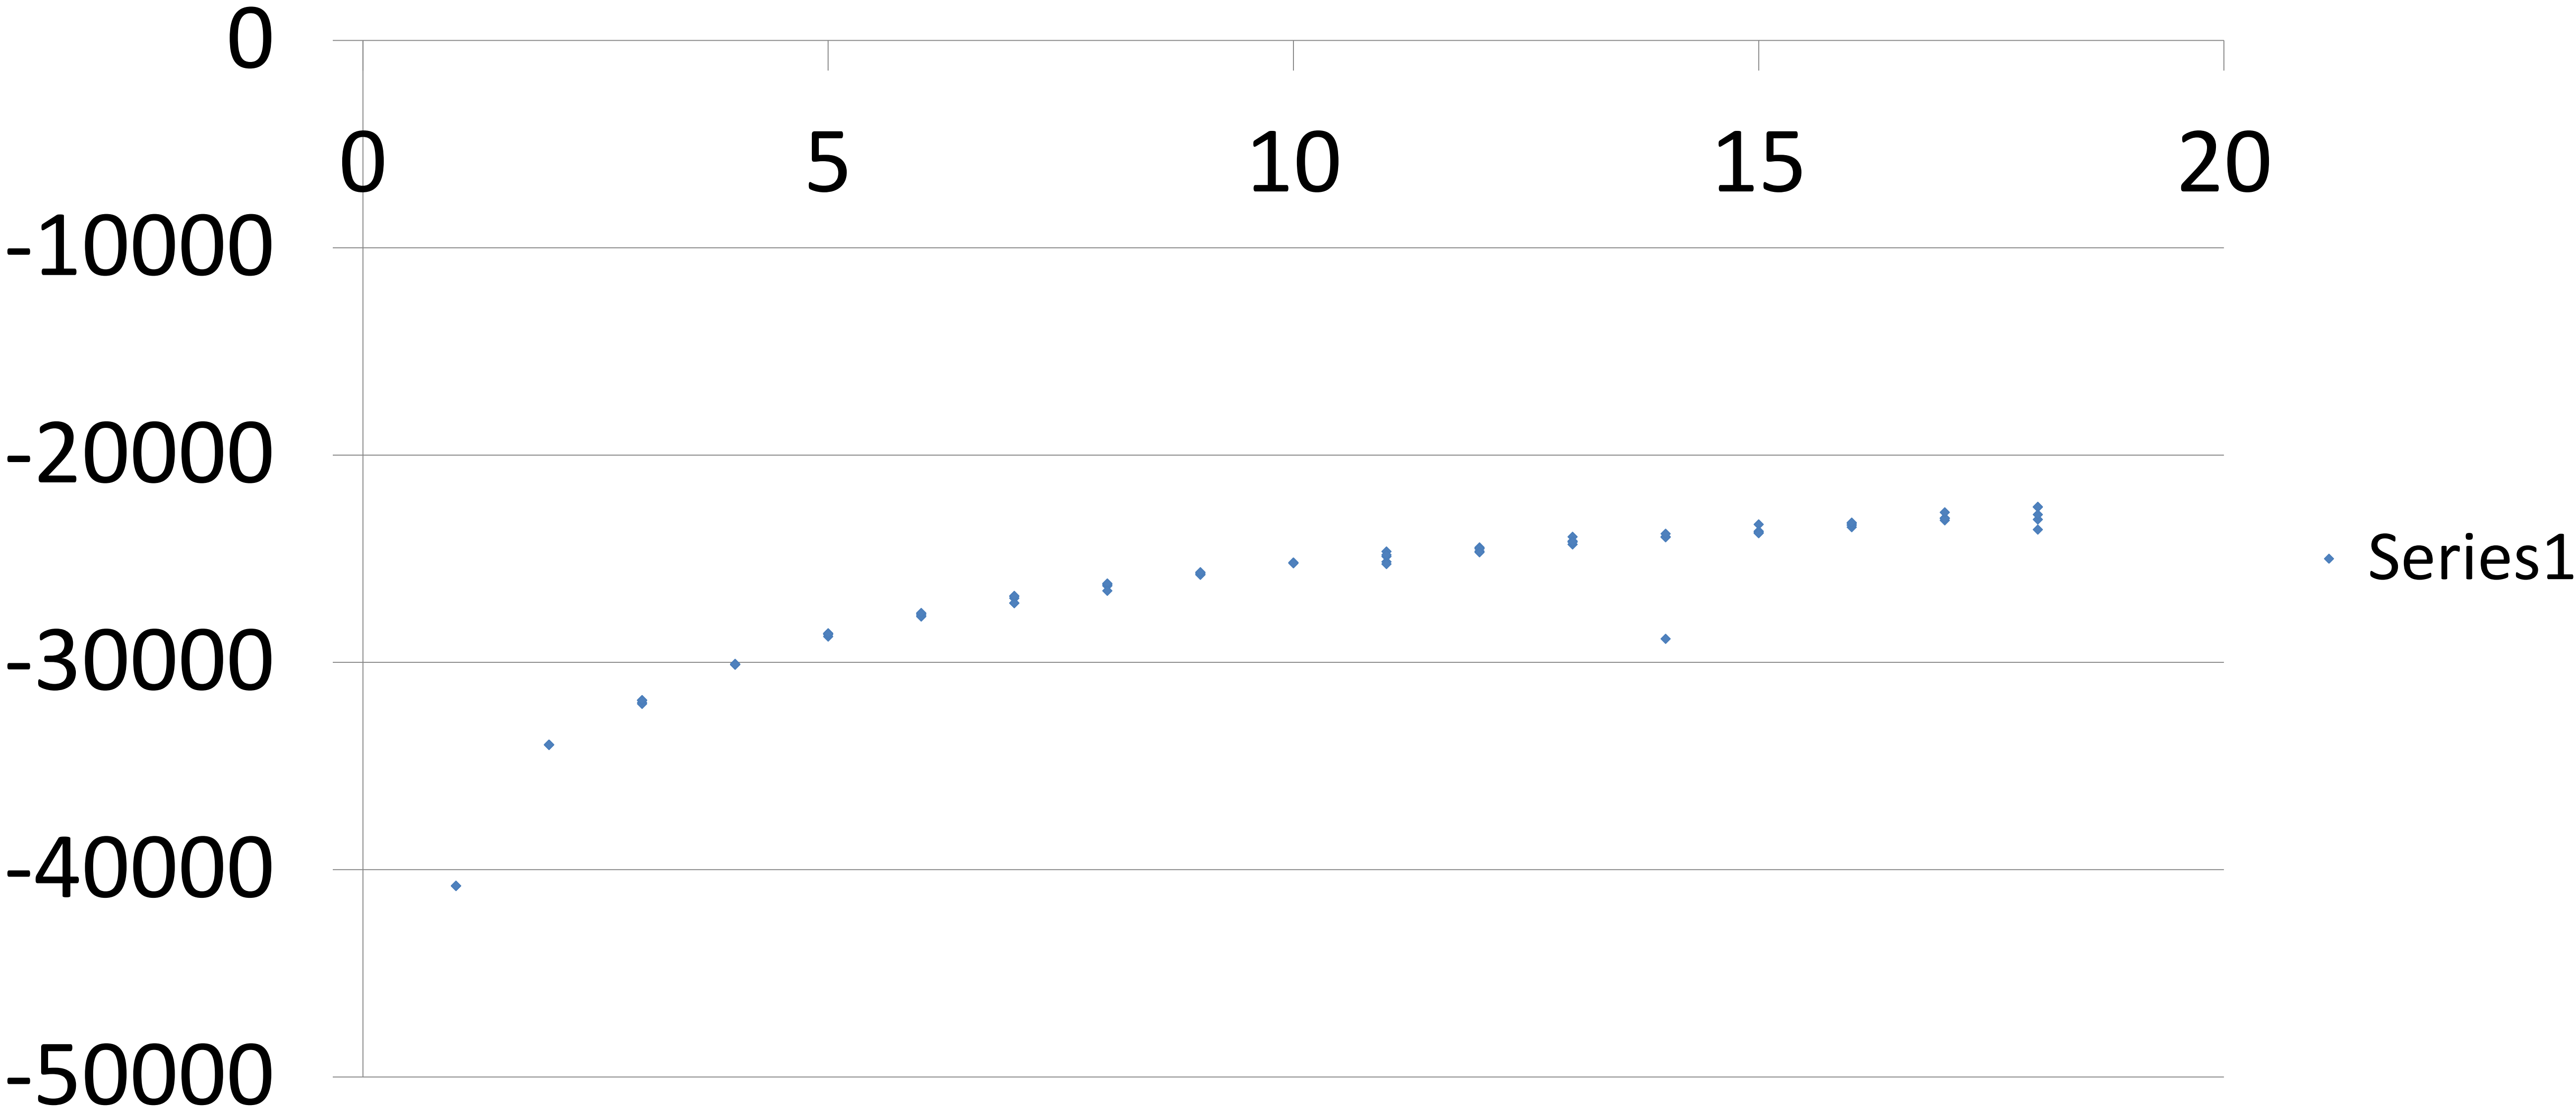

(2B)

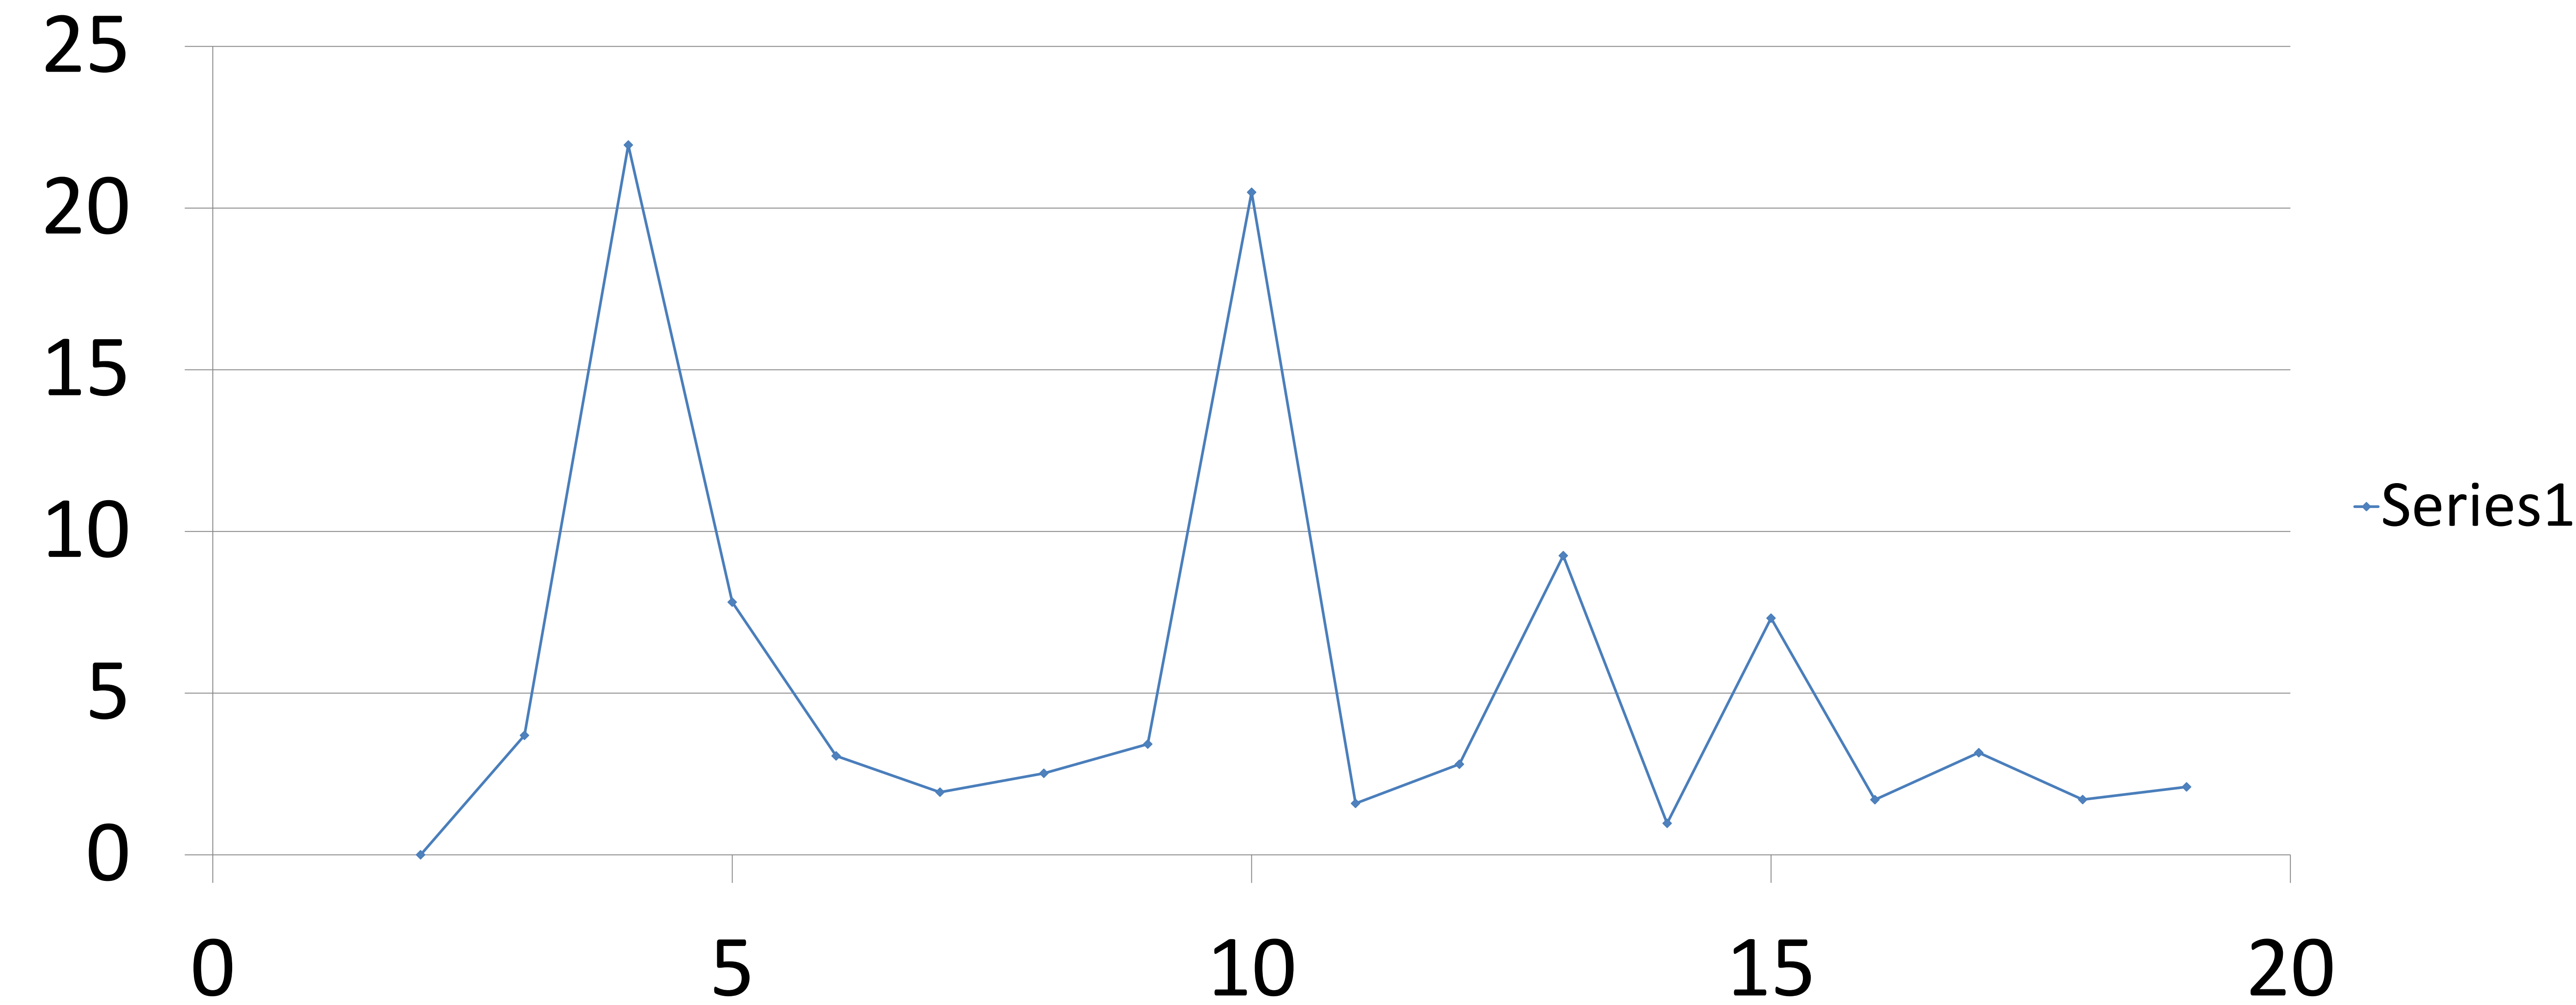

(2C)

| K  | deltaK   |
|----|----------|
| 2  | 511.7    |
| 3  | 3.693    |
| 4  | 21.95029 |
| 5  | 7.812625 |
| 6  | 3.057693 |
| 7  | 1.935923 |
| 8  | 2.519581 |
| 9  | 3.422419 |
| 10 | 20.48836 |
| 11 | 1.588741 |
| 12 | 2.799934 |
| 13 | 9.250288 |
| 14 | 0.972619 |
| 15 | 7.317722 |
| 16 | 1.703095 |
| 17 | 3.156812 |
| 18 | 1.707496 |
| 19 | 2.098822 |

Supplement: Supplementary file 6 [file 1]

(2D)

K = 4, run 20

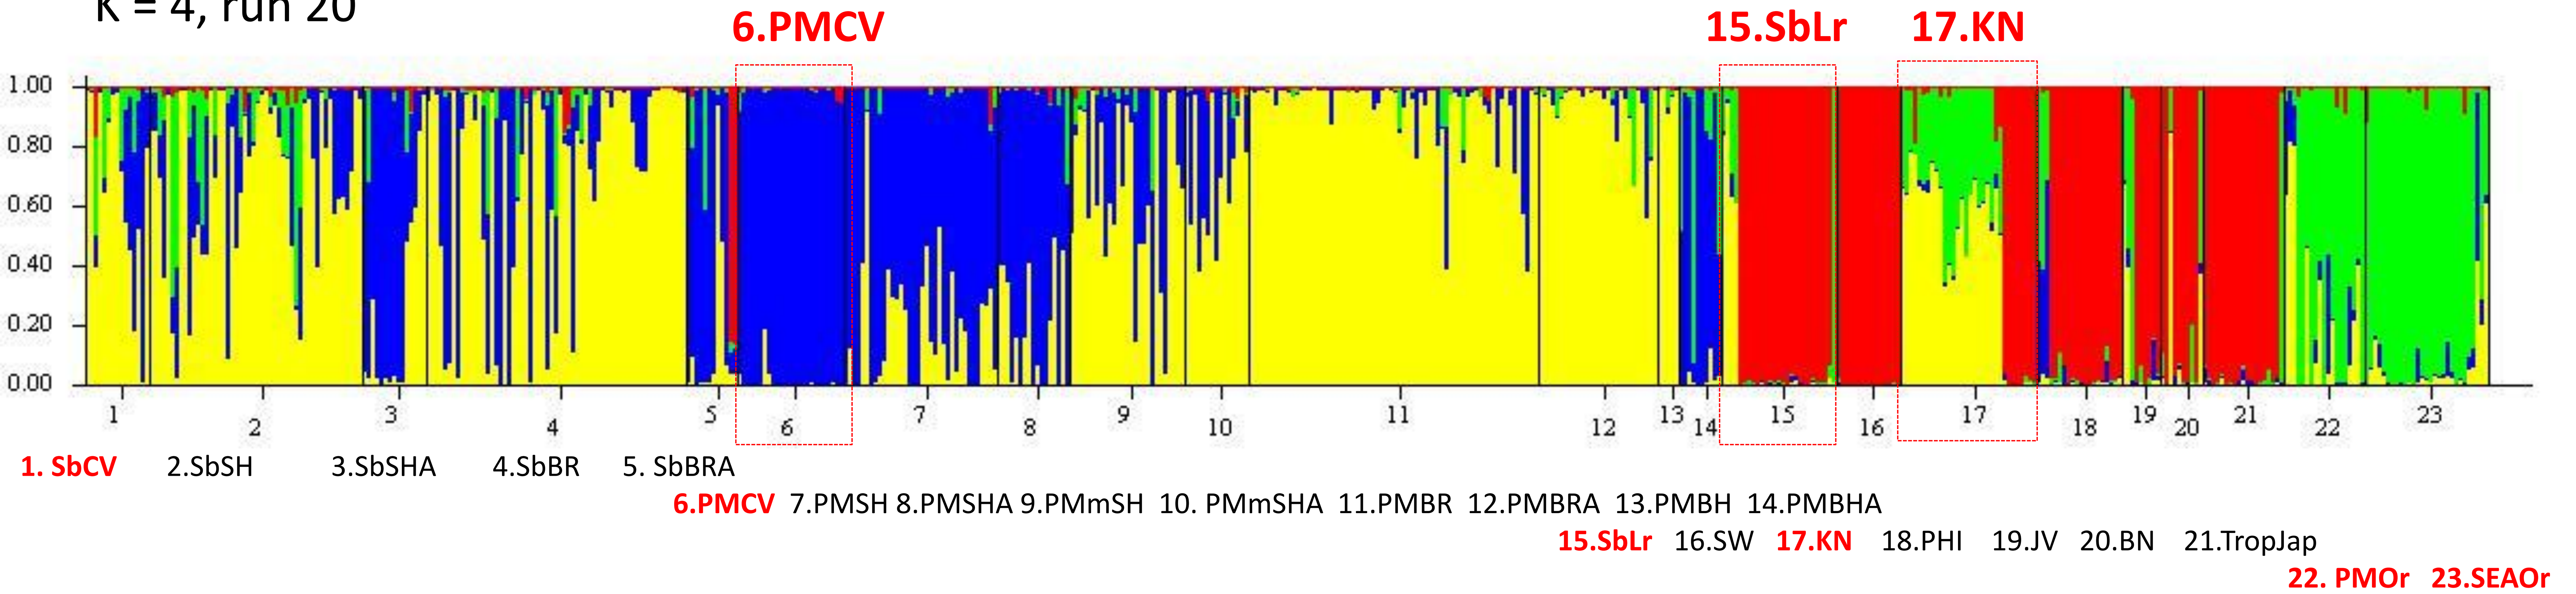

K = 4, run 18

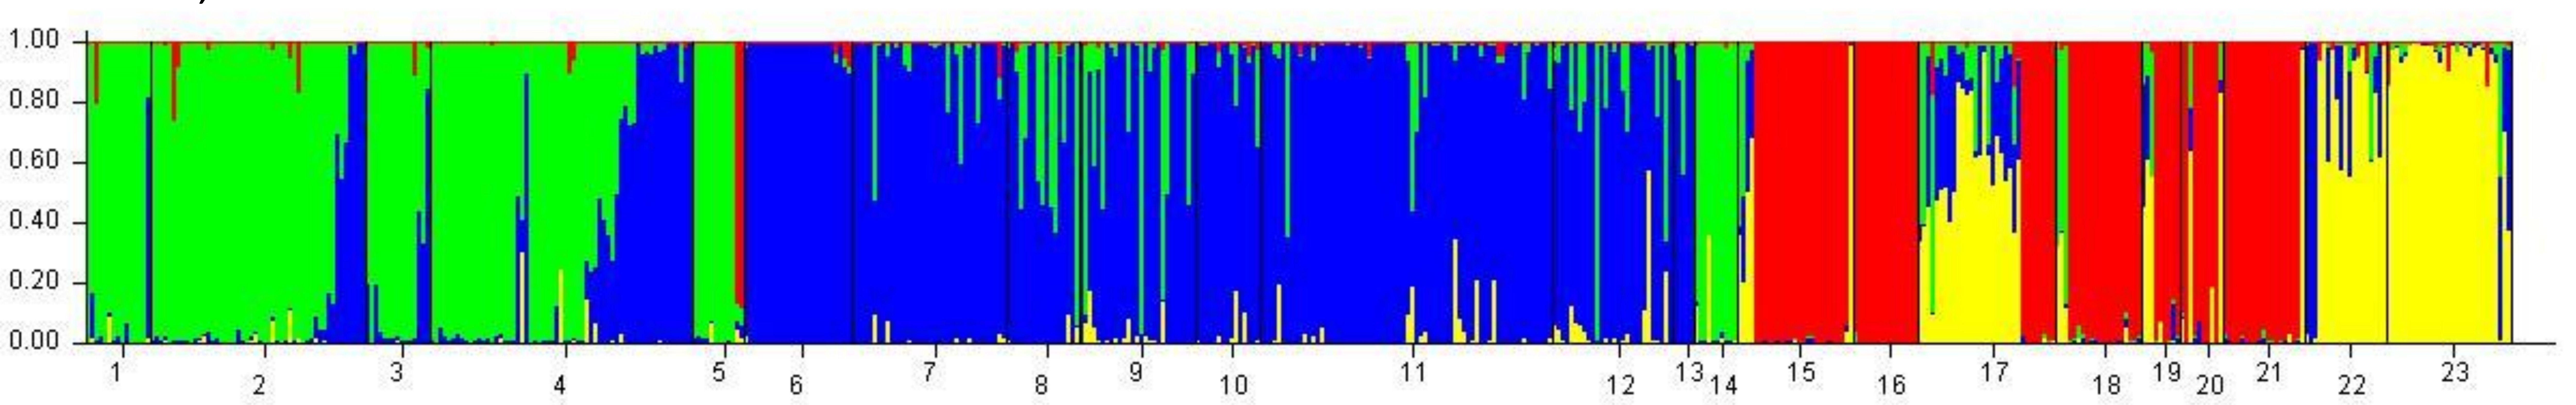

Supplement: Supplementary file 7 [file 1]
